# Supplementary material
Source: publisher figshare collection journal article supplement (https://gsapubs.figshare.com/ndownloader/files/23316605)
Supplement: Supplementary file 1 [file 23316605]

## Sheet: Table DR2
	TABLE DR2. MINERAL INCLUSION DATA
	Results: JS-Erz-3s 125-250 µm
	Grain number	Garnet number	Inclusions ≥2 µm	UHP inclusions	oxides				feldspars		carbon polymorphs		micas		pyroxenes	nesosilicates			carbonate minerals	apatite/ monazite	opaque	others	polyphase inclusions	remarks
					quartz	coesite	cristobalite	rutile	alkali feldspar	plagioclase	graphite	diamond	muscovite-paragonite	phlogopite-biotite	omphacite	titanite	kyanite	zircon
	1	1	yes	no	1	-	-	-	-	-	-	-	-	-	-	-	-	-	-	-	-	-	-	-
	2	2	yes	no	-	-	-	1	-	-	-	-	-	-	-	-	-	1	-	-	-	-	-	-
	3	3	yes	no	-	-	-	-	-	-	-	-	-	-	-	-	3	-	-	-	-	-	-	-
	4	4	yes	no	-	-	-	1	-	-	-	-	-	-	-	-	-	-	at surface	-	-	-	-	-
	5	5	no	no	-	-	-	-	-	-	-	-	-	-	-	-	-	-	-	-	-	-	-	-
	6	6	no	no	-	-	-	-	-	-	-	-	-	-	-	-	-	-	-	-	-	-	-	-
	9	7	no	no	-	-	-	-	-	-	-	-	-	-	-	-	-	-	-	-	-	anatase (at surface)	-	-
	10	8	no	no	-	-	-	-	-	-	-	-	-	-	-	-	-	-	-	-	-	-	-	-
	11	9	yes	no	-	-	-	2	-	-	-	-	3	-	-	-	4	-	-	-	-	-	kyanite + rutile (2)	-
	12	10	no	no	-	-	-	-	-	-	-	-	-	-	-	-	-	-	-	-	-	-	-	-
	13	11	no	no	-	-	-	-	-	-	-	-	-	-	-	-	-	-	-	-	-	-	-	-
	14	12	no	no	-	-	-	-	-	-	-	-	-	-	-	-	-	-	-	-	-	-	-	-
	15	13	no	no	-	-	-	-	-	-	-	-	-	-	-	-	-	-	-	-	-	-	-	-
	16	14	yes	yes	-	4	-	2	-	-	-	-	-	-	-	-	6	-	-	-	-	-	kyanite + rutile (2)	-
	17	15	no	no	-	-	-	-	-	-	-	-	-	-	-	-	-	-	-	-	-	-	-	-
	18	16	no	no	-	-	-	-	-	-	-	-	-	-	-	-	-	-	-	-	-	-	-	-
	19	17	yes	no	-	-	-	-	-	-	-	-	1	-	-	-	-	-	-	-	-	-	-	-
	20	18	yes	yes	-	1	-	-	-	-	-	-	-	-	1	-	-	1	-	-	-	-	-	-
	21	19	no	no	-	-	-	-	-	-	-	-	-	-	-	-	-	-	-	-	-	-	-	-
	22	20	no	no	-	-	-	-	-	-	-	-	-	-	-	-	-	-	-	-	-	-	-	-
	23	21	no	no	-	-	-	-	-	-	-	-	-	-	-	-	-	-	-	-	-	-	-	-
	24	22	yes	no	-	-	-	-	-	-	-	-	1	-	-	-	-	-	-	-	-	-	-	-
	25	23	yes	no	-	-	-	2	-	-	-	-	-	-	-	-	-	1	-	-	-	-	-	-
	26	24	yes	no	1	-	-	-	-	-	-	-	-	-	-	-	-	-	-	2	-	-	-	-
	30	25	no	no	-	-	-	-	-	-	-	-	-	-	-	-	-	-	-	-	-	-	-	-
	31	26	no	no	-	-	-	-	-	-	-	-	-	-	-	-	-	-	-	-	-	-		-
	32	27	no	no	-	-	-	-	-	-	-	-	-	-	-	-	-	-	-	-	-	-	-	-
	33	28	yes	no	-	-	-	>20	-	-	-	-	-	-	-	-	-	1	-	1	-	-	-	-
	34	29	yes	yes	-	2	-	-	-	-	-	-	-	-	-	-	-	-	-	-	-	-	-	-
	35	30	no	no	-	-	-	-	-	-	-	-	-	-	-	-	-	-	-	-	-	-	-	-
	36	31	no	no	-	-	-	-	-	-	-	-	-	-	-	-	-	-	-	-	-	-	-	-
	37	32	yes	no	1	-	-	-	-	-	-	-	-	-	-	-	-	-	-	-	-	-	-	-
	38	33	no	no	-	-	-	-	-	-	-	-	-	-	-	-	-	-	-	-	-	-	-	-
	39	34	yes	no	-	-	-	-	-	-	1	-	-	-	-	-	1	-	-	-	-	-	graphite + kyanite (1)	-
	40	35	no	no	-	-	-	-	-	-	-	-	-	-	-	-	-	-	-	-	-	-	-	-
	41	36	no	no	-	-	-	-	-	-	-	-	-	-	-	-	-	-	-	-	-	anatase (at surface)	-	-
	42	37	yes	no	-	-	-	-	-	-	-	-	-	-	4	-	-	-	-	-	-	-	-	-
	43	38	no	no	-	-	-	-	-	-	-	-	-	-	-	-	-	-	-	-	-	-	-	lithoclast: garnet + alkali feldspar + quartz
	46	39	yes	no	-	-	-	-	-	-	-	-	-	-	-	-	-	-	-	1	1	-	-	-
	47	40	yes	no	-	-	-	>20	-	-	-	-	-	-	-	-	-	-	-	-	-	-	-	-
	49	41	no	no	-	-	-	-	-	-	-	-	-	-	-	-	-	-	-	-	-	-	-	-
	50	42	no	no	-	-	-	-	-	-	-	-	-	-	-	-	-	-	-	-	-	-	-	-
	51	43	no	no	-	-	-	-	-	-	-	-	-	-	-	-	-	-	-	-	-	anatase (at surface)	-	-
	52	44	yes	yes	-	1	-	-	-	-	-	-	-	-	1	-	-	-	-	-	-	-	-	-
	53	45	no	no	-	-	-	-	-	-	-	-	-	-	-	-	-	-	-	-	-	-	-	-
	54	46	yes	no	-	-	-	1	-	-	-	-	-	-	-	-	-	1	-	-	-	-	-	-
	56	47	no	no	-	-	-	-	-	-	-	-	-	-	-	-	-	-	-	-	-	-	-	lithoclast: garnet + quartz
	58	48	no	no	-	-	-	-	-	-	-	-	-	-	-	-	-	-	-	-	-	-	-	-
	59	49	yes	no	-	-	-	6	-	-	-	-	-	-	-	-	-	6	-	-	1	brookite (2)	-	opaque: probably molybdenite
	61	50	no	no	-	-	-	-	-	-	-	-	-	-	-	-	-	-	-	-	-	-	-	-
	62	51	yes	yes	-	1	-	1	-	-	-	-	-	-	-	-	-	-	-	1	-	-	-	-
	63	52	no	no	-	-	-	-	-	-	-	-	-	-	-	-	-	-	-	-	-	-	-	-
	64	53	yes	no	-	-	-	1	-	-	-	-	-	-	-	-	-	-	-	-	-	-	-	-
	65	54	yes	no	2	-	-	-	-	-	-	-	-	-	-	-	-	-	-	1	-	-	-	-
	66	55	yes	no	1	-	-	-	-	-	-	-	-	-	3	-	-	-	2	1	1	-	omphacite + quartz + carbonate mineral (1) omphacite + apatite/monazite (1) carbonate mineral + opaque (1)	-
	67	56	yes	no	-	-	-	-	1	-	-	-	-	-	-	-	-	-	-	-	-	-	-	-
	68	57	yes	no	1	-	-	-	-	-	-	-	-	-	-	-	-	-	-	1	3	-	-	opaque: probably arzakite/hematite
	69	58	no	no	-	-	-	-	-	-	-	-	-	-	-	-	-	-	-	-	2	-	-	-
	70	59	no	no	-	-	-	-	-	-	-	-	-	-	-	-	-	-	-	-	-	-	-	-
	71	60	no	no	-	-	-	-	-	-	-	-	-	-	-	-	-	-	-	-	-	-	-	-
	72	61	no	no	-	-	-	-	-	-	-	-	-	-	-	-	-	-	-	-	-	-	-	-
	73	62	yes	yes	-	1	-	-	-	-	4	-	-	-	-	-	-	-	-	-	1	-	-	-
	74	63	no	no	-	-	-	-	-	-	-	-	-	-	-	-	-	-	-	-	-	-	-	-
	75	64	no	no	-	-	-	-	-	-	-	-	-	-	-	-	-	-	-	-	-	-	-	-
	77	65	yes	no	-	-	-	-	-	-	-	-	-	-	-	-	-	-	-	3	-	-	-	-
	79	66	yes	no	1	-	-	1	-	-	-	-	-	-	-	-	-	-	1	-	-	kokchetavite (1)	quartz + carbonate mineral + kokchetavite (1)	-
	80	67	yes	no	-	-	-	-	-	1	-	-	-	-	-	1	-	-	-	>20	-	-	-	-
	81	68	yes	no	-	-	-	-	-	-	-	-	-	-	-	-	-	-	-	1	-	-	-	-
	82	69	no	no	-	-	-	-	-	-	-	-	-	-	-	-	-	-	-	-	-	-	-	-
	83	70	no	no	-	-	-	-	-	-	-	-	-	-	-	-	-	-	-	-	-	-	-	-
	84	71	yes	no	-	-	-	10	-	-	>20	-	-	-	-	-	-	4	-	-	-	-	-	hundreds of graphite inclusions
	86	72	yes	no	-	-	-	-	-	-	-	-	-	-	-	-	-	3	-	4	5	-	apatite/monazite + zircon + opaque (1)	-
	87	73	yes	no	-	-	-	-	-	-	-	-	-	-	-	-	-	-	-	3	-	-	-	-
	88	74	yes	no	-	-	-	9	-	-	-	-	-	-	-	-	-	2	-	1	-	-	-	-
	89	75	no	no	-	-	-	-	-	-	-	-	-	-	-	-	-	-	-	-	-	-	-	-
	91	76	no	no	-	-	-	-	-	-	-	-	-	-	-	-	-	-	-	-	2	-	-	opaque: probably molybdenite
	92	77	yes	yes	-	1	-	3	-	-	-	-	-	-	-	-	-	-	1	-	-	-	-	-
	93	78	no	no	-	-	-	-	-	-	-	-	-	-	-	-	-	-	-	-	-	-	-	-
	94	79	no	no	-	-	-	-	-	-	-	-	-	-	-	-	-	-	-	-	-	-	-	-
	95	80	no	no	-	-	-	-	-	-	-	-	-	-	-	-	-	-	-	-	-	-	-	-
	96	81	yes	yes	-	1	-	3	-	-	-	-	-	-	-	-	-	-	-	-	1	-	-	opaque: probably pyrhotite/pyrite
	97	82	no	no	-	-	-	-	-	-	-	-	-	-	-	-	-	-	-	-	-	-	-	-
	98	83	no	no	-	-	-	-	-	-	-	-	-	-	-	-	-	-	-	-	-	-	-	-
	99	84	yes	no	-	-	-	-	-	-	-	-	-	-	-	-	1	-	-	-	-	-	-	-
	100	85	yes	no	-	-	-	1	-	-	-	-	-	-	-	-	-	1	-	-	-	-	zircon + rutile (1)	-
	101	86	yes	no	-	-	-	>20	-	-	>20	-	-	-	-	-	-	4	-	-	-	-	graphite + rutile (3) graphite + zircon (3)	hundreds of graphite inclusions
	102	87	yes	no	-	-	-	>20	-	-	-	-	-	-	18	-	-	-	-	-	-	-	-	-
	103	88	no	no	-	-	-	-	-	-	-	-	-	-	-	-	-	-	-	-	-	-	-	-
	104	89	yes	no	-	-	-	-	-	-	-	-	-	-	-	-	-	-	6	1	-	amphibole (2)	amphibole + carbonate mineral (1) amphibole + apatite/monazite + carbonate mineral (1)	-
	105	90	yes	yes	-	4	-	3	-	-	-	-	-	-	1	-	3	-	1	-	-	-	kyanite + rutile (3)	-
	106	91	yes	no	-	-	-	-	-	-	-	-	1	-	-	-	-	1	-	-	-	-	-	-
	107	92	no	no	-	-	-	-	-	-	-	-	-	-	-	-	-	-	-	-	-	-	-	-
	108	93	no	no	-	-	-	-	-	-	-	-	-	-	-	-	-	-	-	-	-	-	-	-
	109	94	yes	no	-	-	-	-	-	-	-	-	-	-	-	1	-	6	-	2	-	-	-	-
	110	95	yes	yes	-	6	-	-	-	-	-	-	-	-	-	-	-	-	-	1	-	-	-	-
	111	96	yes	no	1	-	-	-	-	-	-	-	-	-	-	-	-	-	-	3	2	-	-	-
	112	97	no	no	-	-	-	-	-	-	-	-	-	-	-	-	-	-	-	-	-	-	-	-
	115	98	no	no	-	-	-	-	-	-	-	-	-	-	-	-	-	-	-	-	-	-	-	-
	116	99	yes	no	-	-	-	-	-	-	4	-	-	-	-	-	-	-	-	-	-	-	-	-
	118	100	yes	no	-	-	-	1	-	-	-	-	-	-	-	-	-	-	-	-	1	-	-	opaque: probably chalcopyrite
	119	101	no	no	-	-	-	-	-	-	-	-	-	-	-	-	-	-	-	-	-	-	-	-
	120	102	yes	no	-	-	-	4	-	-	-	-	-	-	-	-	-	2	-	1	-	-	-	-
	121	103	no	no	-	-	-	-	-	-	-	-	-	-	-	-	-	-	-	-	-	-	-	-
	122	104	no	no	-	-	-	-	-	-	-	-	-	-	-	-	-	-	-	-	-	-	-	-
	123	105	no	no	-	-	-	-	-	-	-	-	-	-	-	-	-	-	-	-	-	-	-	-
	124	106	yes	no	-	-	-	4	-	-	-	-	-	-	-	-	-	9	-	-	-	-	-	-
	125	107	no	no	-	-	-	-	-	-	-	-	-	-	-	-	-	-	-	-	-	-	-	-
	127	108	yes	no	-	-	-	19	-	-	-	-	-	-	-	-	-	1	-	-	-	-	-	-
	128	109	yes	no	-	-	-	-	-	-	-	-	-	-	1	-	-	1	-	-	-	-	-	-
	129	110	no	no	-	-	-	-	-	-	-	-	-	-	-	-	-	-	-	-	-	-	-	-
	130	111	no	no	-	-	-	-	-	-	-	-	-	-	-	-	-	-	-	-	-	-	-	-
	132	112	no	no	-	-	-	-	-	-	-	-	-	-	-	-	-	-	-	-	-	-	-	-
	133	113	no	no	-	-	-	-	-	-	-	-	-	-	-	-	-	-	-	-	-	-	-	-
	134	114	yes	no	-	-	-	-	-	-	-	-	-	1	-	-	-	-	-	-	-	-	-	-
	135	115	yes	no	-	-	-	1	-	-	-	-	-	-	-	-	3	-	-	3	-	-	kyanite + rutile (1)	-
	136	116	yes	no	-	-	-	4	-	-	-	-	-	-	-	-	-	1	-	-	-	-	-	-
	137	117	yes	no	-	-	-	2	-	-	-	-	-	-	-	-	-	-	-	-	-	-	-	-
	138	118	yes	no	-	-	-	1	-	-	-	-	-	-	-	-	-	-	-	-	-	-	-	-
	139	119	no	no	-	-	-	-	-	-	-	-	-	-	-	-	-	-	-	-	-	-	-	-
	140	120	yes	no	-	-	-	-	-	-	1	-	-	-	-	-	-	-	-	-	-	-	-	-
	141	121	yes	no	-	-	-	1	-	-	-	-	-	-	1	-	-	2	-	-	1	-	omphacite + zircon (1)	-
	142	122	yes	no	-	-	-	>20	-	-	-	-	-	-	-	-	-	2	-	-	-	-	-	-
	143	123	no	no	-	-	-	-	-	-	-	-	-	-	-	-	-	-	-	-	-	-	-	-
	144	124	yes	no	-	-	-	-	-	-	-	-	-	-	-	-	1	-	1	1	-	-	-	-
	148	125	no	no	-	-	-	-	-	-	-	-	-	-	-	-	-	-	-	-	-	-	-	-
	149	126	no	no	-	-	-	-	-	-	-	-	-	-	-	-	-	-	-	-	-	-	-	-
	150	127	yes	yes	-	1	-	-	-	-	-	-	-	-	-	-	-	-	-	-	-	-	-	-
	151	128	no	no	-	-	-	-	-	-	-	-	-	-	-	-	-	-	-	-	-	-	-	-
	152	129	yes	no	1	-	-	-	-	-	1	-	2	-	-	-	-	-	-	-	-	-	-	-
	153	130	no	no	-	-	-	-	-	-	-	-	-	-	-	-	-	-	-	-	-	-	-	-
	154	131	yes	no	-	-	-	-	-	-	6	-	1	-	-	-	-	-	-	-	-	-	-	-
	155	132	no	no	-	-	-	-	-	-	-	-	-	-	-	-	-	-	-	-	-	-	-	-
	157	133	yes	no	-	-	-	-	-	-	-	-	-	-	-	-	-	2	-	-	-	-	-	-
	158	134	yes	no	2	-	-	-	-	-	-	-	-	-	-	-	-	-	-	-	-	-	-	-
	159	135	no	no	-	-	-	-	-	-	-	-	-	-	-	-	-	-	-	-	2	-	-	-
	160	136	yes	no	2	-	-	-	-	-	-	-	-	-	-	-	-	-	-	-	-	-	-	-
	161	137	no	no	-	-	-	-	-	-	-	-	-	-	-	-	-	-	-	-	-	-	-	-
	162	138	no	no	-	-	-	-	-	-	-	-	-	-	-	-	-	-	-	-	-	-	-	-
	163	139	no	no	-	-	-	-	-	-	-	-	-	-	-	-	-	-	-	-	-	-	-	-
	164	140	no	no	-	-	-	-	-	-	-	-	-	-	-	-	-	-	-	-	-	-	-	-
	165	141	no	no	-	-	-	-	-	-	-	-	-	-	-	-	-	-	-	-	-	-	-	-
	166	142	yes	no	-	-	-	11	-	-	-	-	-	-	-	-	-	6	-	-	-	-	-	-
	167	143	no	no	-	-	-	-	-	-	-	-	-	-	-	-	-	-	-	-	-	-	-	-
	168	144	no	no	-	-	-	-	-	-	-	-	-	-	-	-	-	-	-	-	-	-	-	-
	169	145	no	no	-	-	-	-	-	-	-	-	-	-	-	-	-	-	-	-	-	-	-	-
	170	146	yes	no	-	-	-	1	-	-	-	-	-	-	-	-	-	-	-	-	-	-	-	-
	171	147	no	no	-	-	-	-	-	-	-	-	-	-	-	-	-	-	-	-	-	-	-	-
	174	148	yes	no	-	-	-	-	-	-	-	-	-	6	-	-	-	-	-	-	-	-	-	-
	175	149	yes	no	-	-	-	1	-	-	-	-	-	-	-	-	-	-	-	-	-	-	-	-
	176	150	no	no	-	-	-	-	-	-	-	-	-	-	-	-	-	-	-	-	-	-	-	-
	177	151	no	no	-	-	-	-	-	-	-	-	-	-	-	-	-	-	-	-	-	-	-	-
	178	152	yes	no	-	-	-	-	-	-	-	-	-	-	-	-	-	-	-	3	-	-	-	lithoclast: garnet + quartz
	179	153	yes	no	2	-	-	>20	-	-	-	-	-	-	-	-	-	-	-	-	-	-	-	hundreds of rutile inclusions
	180	154	yes	no	2	-	-	-	-	1	-	-	-	-	-	-	-	-	-	-	-	-	-	-
	181	155	yes	no	-	-	-	1	-	-	-	-	-	-	-	-	-	-	-	-	2	-	-	-
	182	156	no	no	-	-	-	-	-	-	-	-	-	-	-	-	-	-	-	-	-	-	-	-
	183	157	yes	no	-	-	-	3	-	-	-	-	-	-	-	-	-	1	-	-	-	-	-	-
	184	158	yes	no	-	-	-	-	1	-	-	-	2	-	-	-	-	-	-	-	-	-	-	-
	185	159	no	no	-	-	-	-	-	-	-	-	-	-	-	-	-	-	-	-	-	-	-	-
	186	160	no	no	-	-	-	-	-	-	-	-	-	-	-	-	-	-	-	-	-	-	-	lithoclast: garnet + plagioclase
	187	161	yes	yes	-	1	-	-	-	-	-	-	-	-	-	-	-	-	-	-	-	-	-	-
	188	162	no	no	-	-	-	-	-	-	-	-	-	-	-	-	-	-	-	-	1	-	-	-
	192	163	yes	no	-	-	-	1	-	-	-	-	-	-	-	-	-	-	-	-	-	-	-	-
	194	164	no	no	-	-	-	-	-	-	-	-	-	-	-	-	-	-	-	-	-	-	-	-
	195	165	yes	yes	4	3	-	-	-	-	-	-	-	-	-	-	-	-	-	-	-	-	-	high signal-to-noise ratio in coesite inclusion spectra due to their location close to the lower surface of the garnet grain
	197	166	yes	yes	5	2	-	-	-	-	-	-	-	1	-	-	-	-	-	-	-	-	phlogopite-biotite + quartz (1)	-
	198	167	no	no	-	-	-	-	-	-	-	-	-	-	-	-	-	-	-	-	-	-	-	-
	199	168	no	no	-	-	-	-	-	-	-	-	-	-	-	-	-	-	-	-	-	-	-	lithoclast: garnet + quartz
	200	169	yes	no	1	-	-	-	-	-	-	-	-	-	-	-	-	-	-	-	-	-	-	-
	201	170	no	no	-	-	-	-	-	-	-	-	-	-	-	-	-	-	-	-	-	-	-	-
	202	171	no	no	-	-	-	-	-	-	-	-	-	-	-	-	-	-	-	-	-	-	-	-
	205	172	yes	no	2	-	-	-	-	-	-	-	-	-	-	-	-	1	-	-	-	-	-	lithoclast: garnet + quartz
	206	173	yes	yes	-	1	-	-	-	-	-	-	-	-	-	-	1	-	-	-	-	-	-	-
	208	174	yes	no	-	-	-	-	-	-	-	-	-	-	-	-	-	>20	1	-	-	unknown (3)	carbonate mineral + unknown (1)	-
	209	175	no	no	-	-	-	-	-	-	-	-	-	-	-	-	-	-	-	-	-	-	-	-
	210	176	yes	no	-	-	-	4	-	-	-	-	-	-	-	-	-	2	-	5	-	-	-	twinning in one rutile inclusion
	211	177	no	no	-	-	-	-	-	-	-	-	-	-	-	-	-	-	-	-	-	-	-	-
	213	178	no	no	-	-	-	-	-	-	-	-	-	-	-	-	-	-	-	-	-	-	-	-
	214	179	no	no	-	-	-	-	-	-	-	-	-	-	-	-	-	-	-	-	-	-	-	-
	215	180	no	no	-	-	-	-	-	-	-	-	-	-	-	-	-	-	-	-	-	-	-	-
	216	181	yes	no	-	-	-	-	-	1	-	-	-	-	-	-	-	-	-	-	-	-	-	-
	217	182	yes	no	-	-	-	6	-	-	-	-	-	-	-	-	-	-	-	2	-	-	-	-
	218	183	no	no	-	-	-	-	-	-	-	-	-	-	-	-	-	-	-	-	-	-	-	-
	219	184	yes	no	1	-	-	-	-	-	-	-	-	-	-	-	-	-	-	1	-	-	-	-
	221	185	yes	no	-	-	-	9	-	-	-	-	-	-	-	-	1	3	-	-	-	-	-	-
	224	186	yes	no	-	-	-	1	-	-	-	-	-	-	-	-	-	1	-	-	-	-	-	twinning in rutile inclusion
	225	187	yes	no	-	-	-	1	-	-	-	-	-	-	-	-	-	3	-	2	-	-	-	-
	226	188	yes	yes	-	1	-	-	-	-	-	-	-	-	-	-	-	-	-	3	-	-	-	no OH-bands detected in apatite/monazite spectra
	227	189	no	no	-	-	-	-	-	-	-	-	-	-	-	-	-	-	-	-	-	-	-	-
	228	190	yes	no	-	-	-	-	-	-	1	-	1	-	-	-	4	-	-	-	-	-	-	-
	229	191	no	no	-	-	-	-	-	-	-	-	-	-	-	-	-	-	-	-	-	-	-	-
	232	192	yes	no	-	-	-	-	-	-	-	-	-	-	-	-	-	-	-	1	1	-	-	-
	233	193	no	no	-	-	-	-	-	-	-	-	-	-	-	-	-	-	-	-	-	-	-	-
	234	194	no	no	-	-	-	-	-	-	-	-	-	-	-	-	-	-	-	-	-	-	-	-
	235	195	yes	no	-	-	-	1	-	-	-	-	-	-	-	-	-	-	-	-	-	-	-	-
	236	196	yes	no	-	-	-	1	-	-	-	-	-	-	-	-	-	-	-	-	-	-	-	-
	237	197	no	no	-	-	-	-	-	-	-	-	-	-	-	-	-	-	-	-	-	-	-	-
	238	198	no	no	-	-	-	-	-	-	-	-	-	-	-	-	-	-	-	-	-	-	-	-
	239	199	no	no	-	-	-	-	-	-	-	-	-	-	-	-	-	-	-	-	-	-	-	-
	240	200	yes	yes	-	2	-	-	-	-	-	-	-	-	-	-	-	-	-	2	-	-	-	-
		200	100	17	18	17	0	44	2	3	9	0	8	3	8	2	11	29	7	28	16	7	15
	Results: JS-Erz-5s 125-250 µm
	Grain number	Garnet number	Inclusions ≥2 µm	UHP inclusions	oxides				feldspars		carbon polymorphs		micas		pyroxenes	nesosilicates			carbonate minerals	apatite/ monazite	opaque	others	polyphase inclusions	remarks
					quartz	coesite	cristobalite	rutile	alkali feldspar	plagioclase	graphite	diamond	muscovite-paragonite	phlogopite-biotite	omphacite	titanite	kyanite	zircon
	1	1	yes	no	-	-	-	-	-	-	-	-	-	-	-	-	-	-	-	1	-	-	-	OH-bands present in apatite/monazite spectrum
	2	2	yes	no	-	-	-	-	-	-	-	-	-	-	-	-	-	1	-	-	-	-	-	lithoclast: garnet + rutile; many inclusions <2 µm
	4	3	yes	no	-	-	-	3	-	-	-	-	-	-	-	-	-	2	-	6	-	-	-	-
	10	4	no	no	-	-	-	-	-	-	-	-	-	-	-	-	-	-	-	-	-	-	-	-
	11	5	no	no	-	-	-	-	-	-	-	-	-	-	-	-	-	-	-	-	-	-	-	-
	18	6	yes	no	-	-	-	-	-	-	-	-	-	1	-	-	-	-	2	-	-	epistilbite (1)	-	-
	19	7	no	no	-	-	-	-	-	-	-	-	-	-	-	-	-	-	at surface	-	-	-	-	-
	20	8	yes	no	-	-	-	1	-	-	-	-	-	-	-	-	-	-	-	-	-	-	-	-
	23	9	yes	no	-	-	-	1	-	-	1	-	-	-	-	-	-	1	-	-	-	-	zircon + rutile (1)	-
	29	10	yes	no	-	-	-	3	-	-	-	-	-	-	-	-	-	1	-	-	-	-	-	-
	30	11	no	no	-	-	-	-	-	-	-	-	-	-	-	-	-	-	-	-	-	-	-	-
	31	12	no	no	-	-	-	-	-	-	-	-	-	-	-	-	-	-	-	-	-	-	-	-
	32	13	yes	no	-	-	-	2	-	-	-	-	-	-	1	-	-	-	-	-	-	-	-	-
	34	14	yes	no	-	-	-	-	-	-	-	-	-	-	-	-	-	1	-	-	-	-	-	-
	38	15	yes	no	-	-	-	5	-	-	-	-	-	-	-	-	-	-	-	-	-	-	-	-
	39	16	no	no	-	-	-	-	-	-	-	-	-	-	-	-	-	-	-	-	-	-	-	-
	40	17	no	no	-	-	-	-	-	-	-	-	-	-	-	-	-	-	-	-	-	-	-	-
	44	18	yes	no	-	-	-	-	-	-	-	-	-	-	-	-	-	-	-	1	-	-	-	-
	45	19	yes	no	-	-	-	>20	-	-	-	-	-	-	-	-	-	-	-	-	-	-	-	hundreds of rutile inclusions
	47	20	yes	no	-	-	-	-	-	-	-	-	-	-	1	-	-	4	-	-	-	-	-	-
	48	21	yes	no	1	-	-	>20	-	-	-	-	-	-	-	-	-	1	-	-	-	-	-	-
	50	22	yes	no	-	-	-	-	-	-	-	-	-	-	-	-	-	1	-	-	-	-	-	-
	51	23	no	no	-	-	-	-	-	-	-	-	-	-	-	-	-	-	-	-	-	-	-	-
	53	24	no	no	-	-	-	-	-	-	-	-	-	-	-	-	-	-	-	-	-	-	-	-
	54	25	yes	no	-	-	-	5	-	-	-	-	-	-	-	-	-	2	-	1	-	-	zircon + rutile (1)	-
	55	26	yes	no	-	-	-	6	-	-	-	-	-	-	-	-	-	8	-	2	-	-	-	OH-bands present in apatite/monazite spectra
	62	27	yes	no	-	-	-	>20	-	-	-	-	-	-	1	-	-	5	-	-	1	-	-	-
	63	28	yes	no	-	-	-	1	-	-	-	-	-	-	-	-	-	1	-	-	-	-	-	-
	66	29	no	no	-	-	-	-	-	-	-	-	-	-	-	-	-	-	-	-	-	-	-	-
	68	30	no	no	-	-	-	-	-	-	-	-	-	-	-	-	-	-	-	-	-	-	-	-
	69	31	no	no	-	-	-	-	-	-	-	-	-	-	-	-	-	-	-	-	-	-	-	-
	75	32	yes	no	-	-	-	1	-	-	-	-	-	-	-	-	-	-	-	-	-	-	-	-
	78	33	no	no	-	-	-	-	-	-	-	-	-	-	-	-	-	-	-	-	-	-	-	-
	79	34	yes	no	-	-	-	-	-	-	-	-	-	-	-	-	-	1	-	-	-	-	-	-
	83	35	no	no	-	-	-	-	-	-	-	-	-	-	-	-	-	-	-	-	-	-	-	-
	85	36	yes	no	-	-	-	5	-	-	-	-	-	-	1	-	-	2	-	-	-	-	-	-
	86	37	yes	no	-	-	-	4	-	-	-	-	-	-	-	-	-	4	-	-	-	-	-	-
	87	38	yes	no	1	-	-	-	-	1	-	-	-	-	-	-	-	-	-	-	-	-	-	-
	89	39	yes	no	-	-	-	-	-	-	-	-	-	-	-	-	-	1	-	-	-	-	-	-
	96	40	yes	no	-	-	-	-	-	-	-	-	-	-	1	-	-	1	-	-	-	-	-	-
	97	41	no	no	-	-	-	-	-	-	-	-	-	-	-	-	-	-	-	-	-	unknown (1)	-	-
	106	42	no	no	-	-	-	-	-	-	-	-	-	-	-	-	-	-	-	-	-	-	-	-
	107	43	yes	no	-	-	-	-	-	-	-	-	-	-	-	-	-	2	-	-	-	-	-	-
	110	44	yes	no	-	-	-	-	-	-	-	-	-	-	1	-	-	-	-	-	-	-	-	-
	135	45	yes	no	-	-	-	1	-	-	-	-	-	-	2	-	-	3	-	2	-	-	-	-
	136	46	yes	no	-	-	-	1	-	-	-	-	-	-	-	-	-	-	-	-	-	-	-	-
	138	47	yes	no	-	-	-	3	-	-	-	-	-	-	-	-	-	4	-	1	-	-	zircon + rutile (1)	-
	139	48	no	no	-	-	-	-	-	-	-	-	-	-	-	-	-	-	-	-	-	-	-	-
	140	49	yes	no	1	-	-	3	-	-	-	-	-	-	-	-	1	1	-	-	1	-	kyanite + rutile (1)	-
	141	50	no	no	-	-	-	-	-	-	-	-	-	-	-	-	-	-	-	-	-	-	-	-
	142	51	yes	no	-	-	-	-	-	-	-	-	-	-	-	-	1	-	-	-	-	-	-	-
	143	52	yes	no	-	-	-	1	-	-	-	-	-	-	-	-	-	3	-	-	-	-	-	-
	149	53	no	no	-	-	-	-	-	-	-	-	-	-	-	-	-	-	-	-	-	-	-	-
	150	54	no	no	-	-	-	-	-	-	-	-	-	-	-	-	-	-	-	-	-	-	-	-
	156	55	yes	no	-	-	-	>20	-	-	-	-	-	-	-	-	-	6	-	2	-	-	-	OH-bands present in apatite/monazite spectra
	157	56	yes	no	-	-	-	2	-	-	-	-	-	-	-	-	-	-	-	-	-	-	-	-
	158	57	yes	no	-	-	-	2	-	-	-	-	-	-	-	-	-	-	-	-	-	-	-	-
	165	58	no	no	-	-	-	-	-	-	-	-	-	-	-	-	-	-	-	-	-	-	-	-
	166	59	yes	no	-	-	-	-	-	2	-	-	-	-	-	-	-	-	-	1	-	-	-	-
	169	60	no	no	-	-	-	-	-	-	-	-	-	-	-	-	-	-	-	-	-	-	-	-
	170	61	no	no	-	-	-	-	-	-	-	-	-	-	-	-	-	-	-	-	-	-	-	many inclusions <2 µm
	173	62	no	no	-	-	-	-	-	-	-	-	-	-	-	-	-	-	-	-	-	-	-	-
	174	63	no	no	-	-	-	-	-	-	-	-	-	-	-	-	-	-	-	-	-	-	-	-
	175	64	no	no	-	-	-	-	-	-	-	-	-	-	-	-	-	-	-	-	-	-	-	-
	178	65	no	no	-	-	-	-	-	-	-	-	-	-	-	-	-	-	-	-	-	-	-	-
	186	66	no	no	-	-	-	-	-	-	-	-	-	-	-	-	-	-	-	-	-	-	-	-
	187	67	yes	no	-	-	-	1	-	-	-	-	-	-	-	-	-	-	-	-	-	-	-	-
	188	68	no	no	-	-	-	-	-	-	-	-	-	-	-	-	-	-	-	-	-	-	-	-
	195	69	yes	no	-	-	-	4	-	-	-	-	-	-	2	-	-	2	-	-	-	-	-	-
	196	70	yes	no	-	-	-	-	1	-	-	-	-	-	-	-	-	-	-	-	-	-	-	-
	199	71	no	no	-	-	-	-	-	-	-	-	-	-	-	-	-	-	-	-	-	anatase (at surface)	-	-
	200	72	yes	no	-	-	-	1	-	-	-	-	-	-	1	-	1	-	-	-	-	-	-	-
	201	73	yes	no	-	-	-	>20	-	-	-	-	-	-	12	-	-	9	-	>20	-	-	-	OH-bands present in apatite/monazite spectra
	205	74	yes	no	1	-	-	>20	-	-	-	-	-	-	-	-	-	-	-	-	1	-	-	-
	206	75	yes	no	-	-	-	-	-	-	-	-	-	-	-	-	1	-	-	-	-	-	-	-
	209	76	no	no	-	-	-	-	-	-	-	-	-	-	-	-	-	-	-	-	-	anatase (at surface)	-	-
	214	77	no	no	-	-	-	-	-	-	-	-	-	-	-	-	-	-	-	-	-	-	-	-
	215	78	no	no	-	-	-	-	-	-	-	-	-	-	-	-	-	-	-	-	-	-	-	-
	216	79	yes	no	-	-	-	-	-	-	-	-	-	-	-	-	1	-	-	-	2	-	-	-
	217	80	no	no	-	-	-	-	-	-	-	-	-	-	-	-	-	-	-	-	-	-	-	-
	218	81	no	no	-	-	-	-	-	-	-	-	-	-	-	-	-	-	-	-	-	-	-	-
	219	82	no	no	-	-	-	-	-	-	-	-	-	-	-	-	-	-	-	-	-	-	-	-
	223	83	yes	no	-	-	-	7	-	-	-	-	-	-	-	-	-	2	-	10	-	-	-	-
	230	84	no	no	-	-	-	-	-	-	-	-	-	-	-	-	-	-	-	-	-	-	-	-
	231	85	yes	no	-	-	-	7	-	-	-	-	-	-	1	-	-	5	-	13	-	-	-	OH-bands present in apatite/monazite spectra
	239	86	no	no	-	-	-	-	-	-	-	-	-	-	-	-	-	-	-	-	-	-	-	-
	240	87	yes	no	-	-	-	>20	-	-	-	-	-	-	-	-	2	1	-	1	2	-	kyanite + rutile (1)	hundreds of rutile inclusions
	241	88	no	no	-	-	-	-	-	-	-	-	-	-	-	-	-	-	-	-	-	-	-	-
	243	89	no	no	-	-	-	-	-	-	-	-	-	-	-	-	-	-	-	-	-	-	-	-
	249	90	yes	no	-	-	-	>20	-	-	-	-	-	-	1	-	-	-	at surface	-	-	-	-	-
	251	91	yes	no	-	-	-	-	-	-	-	-	-	-	-	-	1	2	-	-	-	-	-	-
	252	92	yes	no	-	-	-	4	-	-	-	-	-	-	-	-	-	-	-	-	-	-	-	-
	263	93	yes	no	1	-	-	-	-	-	-	-	-	-	-	-	-	-	-	-	-	-	-	-
	264	94	yes	no	-	-	-	-	-	-	-	-	-	-	-	-	-	-	-	1	-	-	-	-
	265	95	no	no	-	-	-	-	-	-	-	-	-	-	-	-	-	-	-	-	-	-	-	-
	266	96	yes	no	-	-	-	3	-	-	-	-	-	-	-	-	-	1	-	-	-	unknown (1)	-	-
	269	97	no	no	-	-	-	-	-	-	-	-	-	-	-	-	-	-	-	-	-	-	-	-
	270	98	no	no	-	-	-	-	-	-	-	-	-	-	-	-	-	-	-	-	-	-	-	-
	271	99	no	no	-	-	-	-	-	-	-	-	-	-	-	-	-	-	-	-	-	-	-	-
	272	100	no	no	-	-	-	-	-	-	-	-	-	-	-	-	-	-	-	-	-	-	-	lithoclast: garnet + omphacite + rutile
	274	101	no	no	-	-	-	-	-	-	-	-	-	-	-	-	-	-	-	-	1	-	-	-
	278	102	yes	no	-	-	-	-	-	-	-	-	-	-	-	-	-	-	-	5	-	-	-	-
	279	103	no	no	-	-	-	-	-	-	-	-	-	-	-	-	-	-	-	-	-	-	-	-
	280	104	no	no	-	-	-	-	-	-	-	-	-	-	-	-	-	-	-	-	-	-	-	-
	281	105	yes	no	-	-	-	11	-	-	-	-	-	-	-	-	5	1	-	-	2	-	kyanite + rutile (3)	-
	282	106	yes	no	-	-	-	1	-	-	-	-	-	-	-	-	-	-	-	-	-	-	-	-
	283	107	no	no	-	-	-	-	-	-	-	-	-	-	-	-	-	-	-	-	-	-	-	-
	284	108	no	no	-	-	-	-	-	-	-	-	-	-	-	-	-	-	-	-	-	-	-	-
	285	109	no	no	-	-	-	-	-	-	-	-	-	-	-	-	-	-	-	-	-	-	-	-
	286	110	no	no	-	-	-	-	-	-	-	-	-	-	-	-	-	-	-	-	-	-	-	-
	287	111	no	no	-	-	-	-	-	-	-	-	-	-	-	-	-	-	-	-	-	-	-	-
	288	112	no	no	-	-	-	-	-	-	-	-	-	-	-	-	-	-	-	-	-	-	-	-
	289	113	no	no	-	-	-	-	-	-	-	-	-	-	-	-	-	-	-	-	-	-	-	-
	290	114	no	no	-	-	-	-	-	-	-	-	-	-	-	-	-	-	-	-	-	-	-	-
	291	115	no	no	-	-	-	-	-	-	-	-	-	-	-	-	-	-	-	-	-	-	-	-
	292	116	no	no	-	-	-	-	-	-	-	-	-	-	-	-	-	-	-	-	-	-	-	-
	294	117	no	no	-	-	-	-	-	-	-	-	-	-	-	-	-	-	-	-	-	-	-	-
	295	118	yes	no	-	-	-	4	-	-	-	-	-	-	-	-	-	-	-	-	-	-	-	-
	296	119	yes	no	-	-	-	1	-	-	-	-	-	-	-	-	-	-	-	-	1	-	-	-
	305	120	yes	no	-	-	-	12	-	-	-	-	-	-	-	-	-	-	-	-	-	-	-	-
	307	121	no	no	-	-	-	-	-	-	-	-	-	-	-	-	-	-	-	-	1	-	-	-
	309	122	yes	no	-	-	-	9	-	-	-	-	-	-	-	-	-	1	-	2	-	-	-	-
	310	123	no	no	-	-	-	-	-	-	-	-	-	-	-	-	-	-	-	-	-	-	-	-
	311	124	yes	no	-	-	-	-	-	-	-	-	-	-	-	-	-	-	-	1	-	-	-	-
	314	125	no	no	-	-	-	-	-	-	-	-	-	-	-	-	-	-	-	-	-	-	-	-
	318	126	no	no	-	-	-	-	-	-	-	-	-	-	-	-	-	-	-	-	-	-	-	-
	319	127	yes	no	-	-	-	3	-	-	-	-	-	-	-	-	-	12	-	-	-	-	-	-
	320	128	no	no	-	-	-	-	-	-	-	-	-	-	-	-	-	-	-	-	-	-	-	-
	321	129	yes	no	-	-	-	>20	-	-	-	-	-	-	-	-	-	2	-	1	-	-	-	-
	332	130	no	no	-	-	-	-	-	-	-	-	-	-	-	-	-	-	-	-	-	-	-	-
	333	131	yes	no	-	-	-	-	-	-	-	-	-	-	-	-	-	-	-	1	-	-	-	-
	334	132	no	no	-	-	-	-	-	-	-	-	-	-	-	-	-	-	-	-	-	-	-	-
	339	133	yes	no	-	-	-	1	-	-	-	-	-	-	-	-	-	1	-	-	-	-	-	-
	340	134	yes	no	-	-	-	1	-	-	-	-	-	-	-	-	-	1	-	-	-	-	-	-
	348	135	no	no	-	-	-	-	-	-	-	-	-	-	-	-	-	-	-	-	-	-	-	-
	360	136	yes	no	2	-	-	1	-	-	-	-	-	-	-	-	-	-	-	-	-	-	-	-
	364	137	yes	yes	-	2	-	4	-	-	-	-	-	-	-	-	-	2	-	-	-	-	zircon + rutile (1)	-
	365	138	no	no	-	-	-	-	-	-	-	-	-	-	-	-	-	-	-	-	-	-	-	-
	366	139	no	no	-	-	-	-	-	-	-	-	-	-	-	-	-	-	-	-	-	-	-	-
	367	140	yes	no	1	-	-	1	-	-	-	-	-	-	-	-	-	-	-	-	-	-	-	-
	369	141	yes	no	-	-	-	1	-	-	-	-	-	-	-	-	-	1	-	-	-	-	-	-
	371	142	no	no	-	-	-	-	-	-	-	-	-	-	-	-	-	-	-	-	-	-	-	-
	373	143	yes	no	-	-	-	1	-	-	-	-	-	-	1	-	-	4	-	1	-	-	-	-
	376	144	no	no	-	-	-	-	-	-	-	-	-	-	-	-	-	-	-	-	-	-	-	-
	377	145	no	no	-	-	-	-	-	-	-	-	-	-	-	-	-	-	-	-	-	-	-	-
	378	146	no	no	-	-	-	-	-	-	-	-	-	-	-	-	-	-	-	-	-	-	-	-
	379	147	no	no	-	-	-	-	-	-	-	-	-	-	-	-	-	-	-	-	-	-	-	-
	383	148	no	no	-	-	-	-	-	-	-	-	-	-	-	-	-	-	-	-	-	-	-	-
	384	149	yes	no	-	-	-	>20	-	-	-	-	-	-	-	-	-	-	-	-	-	-	-	-
	385	150	no	no	-	-	-	-	-	-	-	-	-	-	-	-	-	-	-	-	-	-	-	-
	390	151	no	no	-	-	-	-	-	-	-	-	-	-	-	-	-	-	-	-	-	-	-	-
	391	152	no	no	-	-	-	-	-	-	-	-	-	-	-	-	-	-	-	-	-	-	-	-
	392	153	yes	no	-	-	-	-	-	-	-	-	-	-	-	-	-	-	-	1	-	-	-	no OH-bands detected in apatite/monazite spectrum
	399	154	no	no	-	-	-	-	-	-	-	-	-	-	-	-	-	-	-	-	1	-	-	-
	404	155	yes	no	-	-	-	2	-	-	-	-	-	-	-	-	-	1	-	-	-	-	zircon + rutile (1)	-
	405	156	no	no	-	-	-	-	-	-	-	-	-	-	-	-	-	-	-	-	-	-	-	-
	412	157	yes	no	-	-	-	>20	-	-	-	-	-	-	-	-	-	9	-	3	-	-	-	OH-bands present in apatite/monazite spectra
	420	158	yes	no	-	-	-	>20	-	-	-	-	-	-	-	-	-	1	-	7	1	-	-	-
	421	159	yes	no	1	-	-	-	-	-	-	-	-	-	2	-	-	-	-	1	-	-	-	no OH-bands detected in apatite/monazite spectrum
	422	160	yes	no	-	-	-	>20	-	-	-	-	-	-	-	-	-	-	-	1	-	-	-	-
	433	161	yes	no	-	-	-	3	-	-	-	-	-	-	-	-	-	-	-	-	-	-	-	-
	434	162	no	no	-	-	-	-	-	-	-	-	-	-	-	-	-	-	-	-	-	-	-	-
	435	163	no	no	-	-	-	-	-	-	-	-	-	-	-	-	-	-	-	-	-	-	-	-
	436	164	yes	no	-	-	-	>20	-	-	-	-	-	-	-	-	-	1	-	>20	-	-	-	-
	443	165	yes	no	-	-	-	1	-	-	-	-	-	-	-	-	-	-	-	-	-	-	-	-
	444	166	no	no	-	-	-	-	-	-	-	-	-	-	-	-	-	-	-	-	-	-	-	-
	445	167	yes	no	-	-	-	3	-	-	-	-	-	-	-	-	3	-	-	-	-	-	kyanite + rutile (2)	-
	446	168	no	no	-	-	-	-	-	-	-	-	-	-	-	-	-	-	-	-	1	-	-	-
	457	169	no	no	-	-	-	-	-	-	-	-	-	-	-	-	-	-	-	-	-	-	-	-
	460	170	yes	no	-	-	-	-	-	-	1	-	-	-	-	-	-	-	-	-	-	-	-	-
	467	171	no	no	-	-	-	-	-	-	-	-	-	-	-	-	-	-	-	-	-	-	-	-
	470	172	yes	no	-	-	-	-	-	-	-	-	-	-	-	-	-	-	-	2	-	-	-	-
	474	173	yes	no	-	-	-	>20	-	-	-	-	-	-	-	-	-	-	-	-	-	-	-	-
	475	174	yes	no	-	-	-	>20	-	-	-	-	-	-	-	-	-	5	-	-	-	-	-	hundreds of rutile inclusions
	476	175	no	no	-	-	-	-	-	-	-	-	-	-	-	-	-	-	-	-	-	-	-	-
	477	176	no	no	-	-	-	-	-	-	-	-	-	-	-	-	-	-	-	-	-	-	-	-
	478	177	no	no	-	-	-	-	-	-	-	-	-	-	-	-	-	-	-	-	-	-	-	-
	480	178	no	no	-	-	-	-	-	-	-	-	-	-	-	-	-	-	-	-	-	-	-	-
	484	179	no	no	-	-	-	-	-	-	-	-	-	-	-	-	-	-	-	-	-	-	-	-
	490	180	yes	no	-	-	-	-	-	-	-	-	-	-	-	-	-	1	-	-	-	-	-	-
	491	181	no	no	-	-	-	-	-	-	-	-	-	-	-	-	-	-	-	-	-	-	-	-
	492	182	no	no	-	-	-	-	-	-	-	-	-	-	-	-	-	-	-	-	-	-	-	-
	493	183	yes	no	1	-	-	-	-	-	-	-	-	-	1	-	-	-	-	-	-	-	omphacite + quartz (1)	-
	494	184	no	no	-	-	-	-	-	-	-	-	-	-	-	-	-	-	-	-	1	-	-	-
	495	185	no	no	-	-	-	-	-	-	-	-	-	-	-	-	-	-	-	-	-	-	-	-
	496	186	no	no	-	-	-	-	-	-	-	-	-	-	-	-	-	-	-	-	-	-	-	-
	497	187	no	no	-	-	-	-	-	-	-	-	-	-	-	-	-	-	-	-	-	-	-	-
	499	188	yes	no	-	-	-	3	-	-	-	-	-	-	-	-	-	1	-	-	-	-	-	-
	507	189	no	no	-	-	-	-	-	-	-	-	-	-	-	-	-	-	-	-	-	-	-	-
	508	190	yes	no	-	-	-	1	-	-	-	-	-	-	-	-	-	-	-	-	-	-	-	-
	511	191	no	no	-	-	-	-	-	-	-	-	-	-	-	-	-	-	-	-	-	-	-	-
	518	192	no	no	-	-	-	-	-	-	-	-	-	-	-	-	-	-	-	-	-	-	-	-
	519	193	no	no	-	-	-	-	-	-	-	-	-	-	-	-	-	-	-	-	2	-	-	-
	530	194	yes	no	-	-	-	-	-	-	-	-	-	-	-	-	-	-	-	1	-	-	-	no OH-bands detected in apatite/monazite spectrum
	537	195	yes	no	-	-	-	1	-	-	3	-	-	-	-	-	-	-	-	-	-	-	-	-
	538	196	yes	no	2	-	-	-	-	-	1	-	-	-	-	-	-	-	-	3	1	-	-	-
	550	197	no	no	-	-	-	-	-	-	-	-	-	-	-	-	-	-	-	-	-	-	-	-
	553	198	no	no	-	-	-	-	-	-	-	-	-	-	-	-	-	-	-	-	-	-	-	-
	554	199	yes	no	12	-	-	>20	-	-	-	-	-	-	1	-	-	4	-	-	-	-	-	-
	555	200	no	no	-	-	-	-	-	-	-	-	-	-	-	-	-	-	-	-	-	-	-	-
	560	201	no	no	-	-	-	-	-	-	-	-	-	-	-	-	-	-	-	-	-	-	-	-
	566	202	no	no	-	-	-	-	-	-	-	-	-	-	-	-	-	-	-	-	-	-	-	-
	569	203	no	no	-	-	-	-	-	-	-	-	-	-	-	-	-	-	-	-	-	-	-	-
	574	204	no	no	-	-	-	-	-	-	-	-	-	-	-	-	-	-	-	-	-	-	-	-
	575	205	yes	no	-	-	-	-	-	-	1	-	-	-	-	-	-	-	-	-	-	-	-	-
	576	206	no	no	-	-	-	-	-	-	-	-	-	-	-	-	-	-		-	-	-	-	-
	577	207	yes	no	-	-	-	1	-	-	-	-	-	-	1	-	-	-	-	1	-	-	-	-
	578	208	yes	no	-	-	-	3	-	-	-	-	-	-	-	-	-	-	-	4	-	-	-	OH-bands present in apatite/monazite spectra
	579	209	yes	no	-	-	-	-	-	-	-	-	-	-	-	-	-	-	1	1	-	-	-	-
		209	100	1	11	1	0	66	1	2	5	0	0	1	17	0	9	47	2	32	15	5	10
	Results: JS-Erz-6s 125-250 µm
	Grain number	Garnet number	Inclusions ≥2 µm	UHP inclusions	oxides				feldspars		carbon polymorphs		micas		pyroxenes	nesosilicates			carbonate minerals	apatite/ monazite	opaque	others	polyphase inclusions	remarks
					quartz	coesite	cristobalite	rutile	alkali feldspar	plagioclase	graphite	diamond	muscovite-paragonite	phlogopite-biotite	omphacite	titanite	kyanite	zircon
	1	1	yes	no	-	-	-	-	-	-	-	-	-	-	-	-	-	2	-	-	-	-	-	-
	2	2	no	no	-	-	-	-	-	-	-	-	-	-	-	-	-	-	-	-	-	-	-	-
	3	3	yes	no	-	-	-	-	-	-	-	-	-	-	-	-	-	1	-	-	-	-	-	-
	5	4	yes	no	-	-	-	>20	-	-	-	-	-	-	-	-	-	1	-	13	-	-	-	no OH-bands detected in apatite/monazite spectra
	6	5	yes	no	3	-	-	-	-	-	-	-	-	-	-	-	-	-	-	-	-	-	-	-
	7	6	no	no	-	-	-	-	-	-	-	-	-	-	-	-	-	-	-	-	-	-	-	-
	8	7	yes	no	-	-	-	1	-	-	-	-	-	-	-	-	-	1	-	-	-	-	-	-
	9	8	yes	no	-	-	-	1	-	-	-	-	-	-	-	-	-	-	-	-	-	-	-	-
	10	9	yes	no	7	-	-	8	-	-	-	-	-	1	-	-	-	2	-	-	1	-	quartz + rutile (1)	-
	11	10	no	no	-	-	-	-	-	-	-	-	-	-	-	-	-	-	-	-	-	-	-	-
	12	11	yes	no	-	-	-	-	-	-	-	-	-	-	-	-	-	-	-	12	-	-	-	OH-bands present in apatite/monazite spectra
	13	12	yes	no	-	-	-	12	-	-	-	-	-	-	1	-	-	8	-	5	-	-	-	OH-bands present in apatite/monazite spectra
	14	13	no	no	-	-	-	-	-	-	-	-	-	-	-	-	-	-	-	-	-	-	-	-
	15	14	no	no	-	-	-	-	-	-	-	-	-	-	-	-	-	-	-	-	-	-	-	-
	16	15	no	no	-	-	-	-	-	-	-	-	-	-	-	-	-	-	-	-	-	-	-	-
	17	16	no	no	-	-	-	-	-	-	-	-	-	-	-	-	-	-	-	-	-	-	-	-
	22	17	yes	no	-	-	-	>20	-	-	-	-	-	-	-	-	-	5	-	-	2	-	-	opaque: probably allanite
	25	18	yes	no	1	-	-	-	-	-	-	-	-	-	-	-	-	-	-	1	4	-	-	no OH-bands detected in apatite/monazite spectra
	26	19	no	no	-	-	-	-	-	-	-	-	-	-	-	-	-	-	-	-	-	-	-	-
	27	20	yes	no	1	-	-	-	-	-	-	-	-	-	-	-	-	-	-	-	-	-	-	-
	28	21	yes	no	-	-	-	4	-	-	-	-	-	-	-	-	-	-	-	-	-	-	-	-
	29	22	yes	no	-	-	-	>20	-	-	-	-	-	-	-	-	-	3	-	12	-	anatase (at surface)	zircon + rutile (1)	no OH-bands detected in apatite/monazite spectra
	30	23	no	no	-	-	-	-	-	-	-	-	-	-	-	-	-	-	-	-	1	-	-	-
	33	24	no	no	-	-	-	-	-	-	-	-	-	-	-	-	-	-	-	-	-	-	-	-
	34	25	yes	no	-	-	-	7	-	-	-	-	-	-	3	-	-	7	-	-	-	-	-	-
	36	26	yes	no	-	-	-	1	-	-	-	-	-	-	-	-	-	-	-	-	-	-	-	-
	39	27	no	no	-	-	-	-	-	-	-	-	-	-	-	-	-	-	-	-	-	-	-	-
	40	28	yes	no	-	-	-	>20	-	-	-	-	-	-	1	-	-	3	-	13	-	-	-	OH-bands present in apatite/monazite spectra
	41	29	no	no	-	-	-	-	-	-	-	-	-	-	-	-	-	-	-	-	-	-	-	-
	42	30	no	no	-	-	-	-	-	-	-	-	-	-	-	-	-	-	-	-	-	-	-	-
	43	31	yes	no	-	-	-	1	-	-	-	-	-	-	-	-	-	-	-	-	-	-	-	-
	44	32	yes	no	-	-	-	-	-	-	-	-	-	-	-	-	-	1	-	-	-	-	-	-
	46	33	yes	no	-	-	-	1	-	-	-	-	-	-	-	-	4	-	-	-	-	unknown (1)	-	-
	47	34	yes	no	1	-	-	1	-	-	-	-	-	-	-	-	-	-	-	-	-	-	-	-
	49	35	no	no	-	-	-	-	-	-	-	-	-	-	-	-	-	-	-	-	-	unknown (1)	-	-
	50	36	yes	no	-	-	-	1	-	1	-	-	-	-	1	-	-	1	-	2	1	amphibole (1)	amphibole + plagioclase (1)	OH-bands present in apatite/monazite spectra
	51	37	yes	no	13	-	-	-	-	-	-	-	-	-	-	-	-	-	-	-	-	-	-	-
	52	38	no	no	-	-	-	-	-	-	-	-	-	-	-	-	-	-	-	-	-	-	-	-
	53	39	no	no	-	-	-	-	-	-	-	-	-	-	-	-	-	-	-	-	-	-	-	-
	55	40	no	no	-	-	-	-	-	-	-	-	-	-	-	-	-	-	-	-	-	-	-	-
	56	41	no	no	-	-	-	-	-	-	-	-	-	-	-	-	-	-	-	-	-	-	-	-
	57	42	yes	no	-	-	-	1	-	-	-	-	-	-	-	-	-	>20	-	4	-	-	-	OH-bands present in apatite/monazite spectra
	63	43	no	no	-	-	-	-	-	-	-	-	-	-	-	-	-	-	-	-	-	-	-	-
	64	44	no	no	-	-	-	-	-	-	-	-	-	-	-	-	-	-	-	-	-	-	-	-
	65	45	yes	no	-	-	-	1	-	-	-	-	-	-	-	-	-	-	-	-	-	-	-	-
	66	46	yes	no	-	-	-	1	-	-	-	-	-	-	-	-	-	-	-	-	1	unknown (1)	-	-
	68	47	yes	no	-	-	-	-	-	-	-	-	-	-	-	-	-	-	-	1	-	-	-	-
	69	48	yes	no	-	-	-	-	-	-	-	-	-	-	-	-	-	1	-	-	-	-	-	-
	70	49	yes	no	2	-	-	2	-	-	-	-	-	1	-	-	-	-	-	-	-	-	-	-
	71	50	yes	no	-	-	-	4	-	1	-	-	-	-	-	-	-	2	-	-	-	-	-	-
	72	51	no	no	-	-	-	-	-	-	-	-	-	-	-	-	-	-	-	-	-	-	-	-
	73	52	yes	no	-	-	-	4	-	-	-	-	-	-	1	-	-	-	-	1	-	-	-	-
	74	53	yes	no	-	-	-	-	-	-	-	-	-	-	2	-	-	-	-	3	1	-	-	-
	75	54	yes	no	1	-	-	-	-	-	-	-	-	-	-	-	-	-	-	-	2	-	-	-
	76	55	yes	no	-	-	-	-	-	-	-	-	-	-	1	-	-	-	-	-	-	-	-	-
	77	56	yes	no	-	-	-	1	-	-	-	-	-	-	-	-	-	-	-	-	-	-	-	-
	81	57	yes	no	-	-	-	3	-	-	-	-	-	-	-	-	-	3	-	-	-	-	-	-
	82	58	no	no	-	-	-	-	-	-	-	-	-	-	-	-	-	-	-	-	-	-	-	-
	83	59	no	no	-	-	-	-	-	-	-	-	-	-	-	-	-	-	-	-	-	-	-	-
	84	60	no	no	-	-	-	-	-	-	-	-	-	-	-	-	-	-	-	-	1	-	-	-
	86	61	yes	no	-	-	-	4	-	-	-	-	-	-	-	-	-	-	-	2	1	-	-	-
	87	62	no	no	-	-	-	-	-	-	-	-	-	-	-	-	-	-	-	-	-	-	-	-
	88	63	no	no	-	-	-	-	-	-	-	-	-	-	-	-	-	-	-	-	-	-	-	-
	89	64	yes	no	-	-	-	-	-	-	-	-	-	-	-	-	-	-	1	-	-	-	-	-
	91	65	no	no	-	-	-	-	-	-	-	-	-	-	-	-	-	-	-	-	-	-	-	-
	92	66	no	no	-	-	-	-	-	-	-	-	-	-	-	-	-	-	-	-	-	-	-	-
	95	67	no	no	-	-	-	-	-	-	-	-	-	-	-	-	-	-	-	-	-	-	-	-
	96	68	yes	no	1	-	-	-	-	-	-	-	-	-	-	-	-	-	-	-	-	-	-	-
	97	69	yes	no	-	-	-	-	-	-	-	-	-	-	-	-	-	1	-	-	-	-	-	-
	98	70	yes	no	1	-	-	9	-	-	1	-	-	-	-	-	-	-	-	-	6	-	-	-
	99	71	yes	no	-	-	-	1	-	-	-	-	-	-	-	-	-	-	-	-	-	-	-	-
	100	72	no	no	-	-	-	-	-	-	-	-	-	-	-	-	-	-	-	-	-	-	-	-
	103	73	yes	no	-	-	-	-	-	-	-	-	-	-	-	-	-	4	-	-	-	-	-	-
	104	74	yes	no	-	-	-	2	-	-	-	-	-	-	-	-	-	-	-	-	-	-	-	-
	107	75	yes	no	-	-	-	>20	-	-	-	-	-	-	-	-	-	1	-	-	-	-	-	-
	108	76	yes	no	-	-	-	2	-	-	-	-	1	-	-	-	-	1	-	-	-	-	-	-
	109	77	yes	no	1	-	-	16	-	-	-	-	-	-	7	-	-	14	-	>20	-	-	apatite/monazite + rutile (1)	quartz inclusion (20x12 µm) with radial fractures; OH-bands present in apatite/monazite spectra
	110	78	yes	no	-	-	-	1	-	-	-	-	-	-	-	-	-	-	-	1	-	-	-	-
	111	79	no	no	-	-	-	-	-	-	-	-	-	-	-	-	-	-	-	-	-	-	-	-
	112	80	no	no	-	-	-	-	-	-	-	-	-	-	-	-	-	-	-	-	-	-	-	-
	114	81	no	no	-	-	-	-	-	-	-	-	-	-	-	-	-	-	-	-	-	-	-	-
	115	82	yes	no	2	-	-	-	-	-	-	-	-	-	-	-	-	-	-	-	-	-	-	-
	116	83	no	no	-	-	-	-	-	-	-	-	-	-	-	-	-	-	-	-	-	-	-	-
	118	84	yes	no	-	-	-	-	-	-	-	-	-	-	4	-	-	-	-	-	-	-	-	-
	121	85	no	no	-	-	-	-	-	-	-	-	-	-	-	-	-	-	-	-	-	-	-	-
	123	86	no	no	-	-	-	-	-	-	-	-	-	-	-	-	-	-	-	-	-	-	-	-
	124	87	yes	no	-	-	-	>20	-	1	-	-	-	-	-	-	5	1	-	-	-	-	-	-
	125	88	no	no	-	-	-	-	-	-	-	-	-	-	-	-	-	-	-	-	-	-	-	-
	127	89	no	no	-	-	-	-	-	-	-	-	-	-	-	-	-	-	-	-	-	-	-	-
	129	90	no	no	-	-	-	-	-	-	-	-	-	-	-	-	-	-	-	-	-	-	-	-
	130	91	no	no	-	-	-	-	-	-	-	-	-	-	-	-	-	-	-	-	-	-	-	-
	131	92	no	no	-	-	-	-	-	-	-	-	-	-	-	-	-	-	-	-	-	-	-	-
	132	93	yes	no	-	-	-	-	-	-	-	-	-	-	-	-	1	-	-	-	-	-	-	-
	133	94	no	no	-	-	-	-	-	-	-	-	-	-	-	-	-	-	-	-	-	-	-	-
	134	95	no	no	-	-	-	-	-	-	-	-	-	-	-	-	-	-	-	-	-	-	-	-
	135	96	no	no	-	-	-	-	-	-	-	-	-	-	-	-	-	-	-	-	-	-	-	-
	136	97	yes	no	4	-	-	-	-	-	-	-	-	-	-	-	-	-	-	1	-	-	-	-
	137	98	no	no	-	-	-	-	-	-	-	-	-	-	-	-	-	-	-	-	1	-	-	-
	140	99	yes	no	-	-	-	3	-	-	-	-	-	-	-	-	-	1	-	-	-	-	-	-
	146	100	yes	no	1	-	-	>20	-	-	-	-	-	-	-	-	-	-	-	1	2	-	-	-
	147	101	yes	no	-	-	-	6	-	-	10	-	-	-	-	-	-	4	-	1	-	-	zircon + rutile (1)	apatite/monazite = monazite(Ce)
	152	102	yes	no	-	-	-	>20	-	-	-	-	-	-	-	-	-	1	-	-	-	-	-	-
	153	103	yes	no	-	-	-	-	-	-	-	-	-	-	-	-	1	-	-	-	1	-	-	-
	156	104	yes	no	-	-	-	1	-	-	-	-	-	-	1	-	-	1	-	6	-	-	-	OH-bands present in apatite/monazite spectra
	157	105	yes	no	-	-	-	2	-	-	-	-	-	-	-	-	-	1	-	-	-	-	-	-
	158	106	yes	no	-	-	-	-	-	-	-	-	-	-	-	-	-	-	-	1	-	-	-	apatite/monazite = monazite(Ce)
	159	107	yes	no	-	-	-	-	-	-	-	-	-	-	-	-	-	-	>20	-	-	-	-	carbonate mineral inclusions arranged in a line (secondary)
	163	108	yes	no	-	-	-	4	-	-	-	-	-	-	-	-	-	-	-	-	-	-	-	-
	164	109	yes	no	-	-	-	1	-	-	-	-	-	-	-	-	-	-	-	-	-	-	-	-
	165	110	yes	no	-	-	-	2	-	-	-	-	-	-	-	-	-	-	-	-	-	-	-	-
	166	111	yes	no	-	-	-	2	-	-	-	-	-	-	-	-	-	-	-	-	-	-	-	-
	168	112	yes	no	-	-	-	2	-	-	-	-	-	-	-	-	-	-	-	-	-	-	-	-
	170	113	yes	no	-	-	-	3	-	-	-	-	-	-	-	-	-	3	-	-	-	-	-	-
	172	114	yes	no	-	-	-	2	-	-	-	-	-	-	-	-	-	1	-	-	1	-	-	-
	175	115	yes	no	-	-	-	1	-	-	-	-	-	-	-	14	-	-	-	-	1	-	-	-
	185	116	no	no	-	-	-	-	-	-	-	-	-	-	-	-	-	-	-	-	-	-	-	-
	186	117	yes	no	-	-	-	1	-	-	-	-	-	-	-	1	-	2	-	-	-	-	-	-
	188	118	no	no	-	-	-	-	-	-	-	-	-	-	-	-	-	-	-	-	-	-	-	-
	189	119	no	no	-	-	-	-	-	-	-	-	-	-	-	-	-	-	-	-	-	-	-	-
	192	120	yes	no	-	-	-	-	-	-	-	-	-	-	-	-	-	6	-	-	-	-	-	-
	200	121	no	no	-	-	-	-	-	-	-	-	-	-	-	-	-	-	-	-	-	-	-	-
	201	122	no	no	-	-	-	-	-	-	-	-	-	-	-	-	-	-	-	-	-	-	-	-
	202	123	no	no	-	-	-	-	-	-	-	-	-	-	-	-	-	-	-	-	-	-	-	-
	205	124	yes	no	-	-	-	>20	-	-	-	-	-	-	-	-	-	2	-	-	-	-	-	-
	206	125	no	no	-	-	-	-	-	-	-	-	-	-	-	-	-	-	-	-	-	-	-	-
	208	126	no	no	-	-	-	-	-	-	-	-	-	-	-	-	-	-	-	-	-	-	-	-
	209	127	no	no	-	-	-	-	-	-	-	-	-	-	-	-	-	-	-	-	-	-	-	-
	213	128	yes	no	-	-	-	1	-	-	-	-	-	-	-	-	-	1	-	2	2	amphibole (1)	-	no OH-bands detected in apatite/monazite spectra
	215	129	no	no	-	-	-	-	-	-	-	-	-	-	-	-	-	-	-	-	-	-	-	-
	216	130	no	no	-	-	-	-	-	-	-	-	-	-	-	-	-	-	-	-	-	-	-	-
	220	131	no	no	-	-	-	-	-	-	-	-	-	-	-	-	-	-	-	-	-	-	-	-
	221	132	yes	no	-	-	-	4	-	-	-	-	-	-	-	-	-	-	-	2	-	-	-	-
	222	133	yes	no	-	-	-	2	-	-	-	-	-	-	-	-	-	1	-	-	-	-	-	-
	223	134	yes	no	-	-	-	4	-	-	-	-	-	-	1	-	-	2	-	2	-	-	-	no OH-bands detected in apatite/monazite spectra
	226	135	yes	no	-	-	-	12	-	-	-	-	-	-	-	-	-	1	-	10	-	-	-	-
	227	136	no	no	-	-	-	-	-	-	-	-	-	-	-	-	-	-	-	-	-	-	-	-
	229	137	no	no	-	-	-	-	-	-	-	-	-	-	-	-	-	-	-	-	-	-	-	-
	230	138	no	no	-	-	-	-	-	-	-	-	-	-	-	-	-	-	-	-	-	-	-	-
	231	139	yes	no	-	-	-	2	-	-	-	-	-	-	-	-	-	-	-	-	-	-	-	-
	232	140	yes	no	-	-	-	-	-	-	-	-	-	-	-	-	1	-	-	-	-	-	-	-
	233	141	yes	no	-	-	-	>20	-	-	-	-	-	-	9	-	-	-	-	-	-	-	-	many inclusions <2 µm
	235	142	yes	no	-	-	-	8	-	-	-	-	-	-	-	-	-	-	-	1	-	-	-	-
	236	143	yes	no	-	-	-	1	-	-	-	-	-	-	-	-	-	-	-	-	-	-	-	-
	237	144	no	no	-	-	-	-	-	-	-	-	-	-	-	-	-	-	-	-	-	-	-	-
	238	145	yes	no	-	-	-	16	-	-	-	-	-	-	12	-	-	6	-	-	-	-	-	-
	239	146	no	no	-	-	-	-	-	-	-	-	-	-	-	-	-	-	-	-	-	-	-	-
	240	147	no	no	-	-	-	-	-	-	-	-	-	-	-	-	-	-	-	-	5	-	-	-
	241	148	yes	no	-	-	-	3	-	-	-	-	-	-	1	-	-	-	-	-	-	-	-	-
	242	149	yes	no	-	-	-	2	-	-	-	-	-	-	-	-	-	10	-	1	-	-	-	-
	243	150	yes	no	-	-	-	>20	-	-	-	-	-	-	-	-	-	>20	-	1	-	-	-	-
	244	151	no	no	-	-	-	-	-	-	-	-	-	-	-	-	-	-	-	-	-	-	-	-
	245	152	no	no	-	-	-	-	-	-	-	-	-	-	-	-	-	-	-	-	-	-	-	-
	246	153	yes	no	-	-	-	-	-	-	-	-	-	-	-	-	-	1	-	-	-	-	-	-
	247	154	no	no	-	-	-	-	-	-	-	-	-	-	-	-	-	-	-	-	-	-	-	-
	249	155	yes	no	-	-	-	1	-	-	-	-	-	-	-	-	-	-	-	-	1	-	-	-
	250	156	yes	no	-	-	-	-	-	-	-	-	-	-	-	-	-	-	-	2	-	-	-	-
	252	157	no	no	-	-	-	-	-	-	-	-	-	-	-	-	-	-	-	-	-	-	-	-
	253	158	yes	no	-	-	-	9	-	-	-	-	-	-	1	-	-	4	-	2	-	-	-	-
	254	159	yes	no	-	-	-	-	-	-	-	-	-	-	-	-	1	-	-	-	-	-	-	-
	259	160	no	no	-	-	-	-	-	-	-	-	-	-	-	-	-	-	-	-	-	-	-	-
	260	161	yes	no	-	-	-	>20	-	-	-	-	-	-	13	-	-	6	-	>20	-	-	-	no OH-bands detected in apatite/monazite spectra
	264	162	no	no	-	-	-	-	-	-	-	-	-	-	-	-	-	-	-	-	-	-	-	-
	265	163	yes	no	-	-	-	1	-	-	-	-	-	-	-	-	-	-	-	-	-	-	-	-
	266	164	no	no	-	-	-	-	-	-	-	-	-	-	-	-	-	-	-	-	-	-	-	-
	267	165	yes	no	-	-	-	-	-	-	-	-	-	-	-	-	-	1	-	-	-	-	-	-
	271	166	no	no	-	-	-	-	-	-	-	-	-	-	-	-	-	-	-	-	-	-	-	-
	272	167	yes	no	2	-	-	>20	-	-	-	-	-	-	-	-	-	7	-	3	-	-	-	hundreds of rutile inclusions
	273	168	yes	no	-	-	-	8	-	-	-	-	-	-	-	-	-	-	-	5	-	-	-	-
	274	169	no	no	-	-	-	-	-	-	-	-	-	-	-	-	-	-	-	-	-	-	-	-
	275	170	yes	no	-	-	-	3	-	-	-	-	-	-	-	-	-	4	-	2	-	-	-	-
	276	171	yes	no	2	-	-	2	-	-	-	-	-	-	-	-	-	1	-	1	-	-	-	no OH-bands detected in apatite/monazite spectrum
	277	172	yes	no	-	-	-	3	-	-	-	-	-	-	-	-	-	-	-	1	1	-	-	OH-bands present in apatite/monazite spectrum
		172	100	0	16	0	0	70	0	3	2	0	1	2	16	2	6	46	2	34	20	6	5
	Results: JS-Erz-8s 125-250 µm
	Grain number	Garnet number	Inclusions ≥2 µm	UHP inclusions	oxides				feldspars		carbon polymorphs		micas		pyroxenes	nesosilicates			carbonate minerals	apatite/ monazite	opaque	others	polyphase inclusions	remarks
					quartz	coesite	cristobalite	rutile	alkali feldspar	plagioclase	graphite	diamond	muscovite-paragonite	phlogopite-biotite	omphacite	titanite	kyanite	zircon
	1	1	yes	no	-	-	-	2	-	-	-	-	-	-	-	-	2	-	-	-	1	-	kyanite + rutile (2)	-
	2	2	yes	no	-	-	-	-	-	1	-	-	-	-	-	-	-	-	-	-	-	-	-	many inclusions <2 µm
	3	3	no	no	-	-	-	-	-	-	-	-	-	-	-	-	-	-	-	-	-	-	-	-
	5	4	yes	no	6	-	-	-	-	-	-	-	-	-	-	-	1	1	1	-	-	phyllosilicate (1)	-	-
	6	5	no	no	-	-	-	-	-	-	-	-	-	-	-	-	-	-	-	-	-	-	-	-
	7	6	yes	no	-	-	-	10	-	-	-	-	-	-	-	-	-	-	-	-	-	-	-	-
	8	7	no	no	-	-	-	-	-	-	-	-	-	-	-	-	-	-	-	-	-	-	-	-
	9	8	yes	no	-	-	-	-	1	-	-	-	-	-	-	-	-	-	-	1	-	-	-	-
	10	9	yes	no	-	-	1	3	-	-	1	-	-	-	-	-	-	-	-	-	-	anatase (1) unknown (2)	rutile + anatase (1) graphite + unknown (1)	polyphase inclusions similar to polyphase inclusions in sample JS-Erz-9s
	11	10	yes	no	-	-	-	9	-	-	-	-	-	-	-	-	-	-	-	-	-	-	-	-
	12	11	no	no	-	-	-	-	-	-	-	-	-	-	-	-	-	-	-	-	-	-	-	-
	13	12	no	no	-	-	-	-	-	-	-	-	-	-	-	-	-	-	-	-	-	-	-	-
	14	13	yes	no	-	-	-	2	-	-	-	-	-	-	-	-	-	17	-	-	-	-	-	-
	15	14	no	no	-	-	-	-	-	-	-	-	-	-	-	-	-	-	-	-	-	-	-	-
	16	15	no	no	-	-	-	-	-	-	-	-	-	-	-	-	-	-	-	-	1	-	-	-
	17	16	no	no	-	-	-	-	-	-	-	-	-	-	-	-	-	-	-	-	1	-	-	-
	18	17	no	no	-	-	-	-	-	-	-	-	-	-	-	-	-	-	at surface	-	-	-	-	-
	19	18	no	no	-	-	-	-	-	-	-	-	-	-	-	-	-	-	at surface	-	-	-	-	-
	20	19	yes	no	-	-	-	2	-	-	-	-	-	-	-	-	-	-	-	-	-	-	-	-
	21	20	yes	no	-	-	-	9	-	-	-	-	-	-	-	-	-	3	-	1	-	-	-	-
	22	21	yes	no	-	-	-	11	-	-	-	-	-	-	-	-	-	-	-	-	-	-	-	-
	23	22	no	no	-	-	-	-	-	-	-	-	-	-	-	-	-	-	-	-	-	-	-	-
	25	23	yes	no	1	-	-	-	-	-	-	-	-	-	-	-	1	-	-	-	-	-	kyanite + quartz (1)	-
	27	24	no	no	-	-	-	-	-	-	-	-	-	-	-	-	-	-	-	-	-	-	-	-
	28	25	yes	no	-	-	-	5	-	-	-	-	-	-	-	-	-	-	-	-	-	-	-	-
	29	26	no	no	-	-	-	-	-	-	-	-	-	-	-	-	-	-	-	-	-	-	-	-
	31	27	yes	no	-	-	-	-	-	-	-	-	-	-	-	-	-	1	-	-	-	-	-	-
	32	28	yes	no	1	-	-	-	-	-	-	-	-	-	-	-	1	-	-	-	-	-	-	-
	33	29	no	no	-	-	-	-	-	-	-	-	-	-	-	-	-	-	-	-	-	-	-	-
	34	30	no	no	-	-	-	-	-	-	-	-	-	-	-	-	-	-	-	-	-	-	-	-
	35	31	yes	no	-	-	-	6	-	-	-	-	-	-	-	-	-	7	-	>20	-	-	-	OH-bands present in apatite/monazite spectra
	36	32	no	no	-	-	-	-	-	-	-	-	-	-	-	-	-	-	-	-	-	-	-	-
	37	33	yes	no	-	-	-	3	-	-	-	-	-	-	-	-	-	1	-	-	-	-	-	-
	38	34	yes	no	1	-	-	-	-	-	-	-	-	-	-	-	-	-	-	-	-	-	-	-
	39	35	no	no	-	-	-	-	-	-	-	-	-	-	-	-	-	-	-	-	-	-	-	-
	40	36	yes	no	-	-	-	1	-	-	-	-	-	-	-	-	-	-	-	-	-	-	-	-
	41	37	no	no	-	-	-	-	-	-	-	-	-	-	-	-	-	-	-	-	-	-	-	-
	42	38	yes	no	-	-	-	7	-	-	-	-	-	-	-	-	-	-	-	1	-	-	-	-
	43	39	no	no	-	-	-	-	-	-	-	-	-	-	-	-	-	-	-	-	-	-	-	-
	45	40	yes	no	-	-	-	7	-	-	-	-	-	-	-	-	-	3	-	-	-	-	-	twinning in one rutile inclusion
	46	41	no	no	-	-	-	-	-	-	-	-	-	-	-	-	-	-	-	-	-	-	-	-
	48	42	yes	no	-	-	-	-	-	-	-	-	-	-	-	-	1	-	-	-	-	-	-	-
	50	43	no	no	-	-	-	-	-	-	-	-	-	-	-	-	-	-	-	-	-	-	-	-
	51	44	yes	no	-	-	-	6	-	-	-	-	-	-	-	-	-	-	-	-	-	-	-	twinning in one rutile inclusion
	53	45	yes	no	-	-	-	-	-	-	-	-	-	-	1	-	-	-	-	1	-	-	-	-
	64	46	no	no	-	-	-	-	-	-	-	-	-	-	-	-	-	-	-	-	-	-	-	-
	65	47	yes	no	-	-	-	-	-	-	-	-	-	-	-	-	-	-	-	2	-	-	-	-
	66	48	yes	no	-	-	-	2	-	-	4	-	-	-	-	-	-	>20	-	5	-	-	-	zircon inclusions arranged in a line
	67	49	yes	no	1	-	-	-	-	-	-	-	1	-	-	-	-	-	-	-	-	jadeite (1)	jadeite + muscovite-paragonite (1)	-
	68	50	yes	no	-	-	-	1	-	-	-	-	-	-	-	-	-	-	-	-	-	-	-	-
	69	51	no	no	-	-	-	-	-	-	-	-	-	-	-	-	-	-	-	-	-	-	-	-
	70	52	yes	no	2	-	-	-	-	-	-	-	-	-	1	-	-	>20	-	5	-	-	-	many inclusions <2 µm
	73	53	no	no	-	-	-	-	-	-	-	-	-	-	-	-	-	-	-	-	-	-	-	-
	74	54	yes	no	-	-	-	1	-	-	>20	-	-	-	-	-	-	-	-	-	-	-	-	-
	75	55	yes	no	-	-	-	-	-	-	-	-	-	-	-	-	-	-	-	1	1	-	-	-
	83	56	yes	yes	1	1	-	>20	-	-	-	-	-	-	-	-	-	2	-	-	-	brookite (2)	zircon + brookite	one larger quartz inclusions located at the rim (garnet broken at fractures from the inclusion)
	84	57	no	no	-	-	-	-	-	-	-	-	-	-	-	-	-	-	-	-	-	-	-	-
	85	58	yes	no	-	-	-	-	-	-	-	-	-	-	-	-	1	1	-	-	5	-	-	two large cavities with fractures
	86	59	yes	no	-	-	-	1	-	-	1	-	-	-	-	-	1	-	-	1	-	-	kyanite + rutile (1)	-
	87	60	yes	no	-	-	-	-	-	-	-	-	1	-	-	-	-	1	-	-	-	-	-	-
	88	61	no	no	-	-	-	-	-	-	-	-	-	-	-	-	-	-	-	-	-	-	-	-
	89	62	yes	no	-	-	-	-	-	-	-	-	-	-	1	-	-	-	-	-	-	-	-	-
	91	63	yes	no	1	-	-	-	-	-	-	-	-	-	-	-	-	-	-	-	-	-	-	-
	92	64	no	no	-	-	-	-	-	-	-	-	-	-	-	-	-	-	-	-	-	-	-	-
	93	65	no	no	-	-	-	-	-	-	-	-	-	-	-	-	-	-	-	-	-	-	-	-
	97	66	no	no	-	-	-	-	-	-	-	-	-	-	-	-	-	-	-	-	-	-	-	-
	99	67	no	no	-	-	-	-	-	-	-	-	-	-	-	-	-	-	-	-	-	-	-	lithoclast: garnet + plagioclase
	104	68	no	no	-	-	-	-	-	-	-	-	-	-	-	-	-	-	-	-	-	-	-	-
	105	69	no	no	-	-	-	-	-	-	-	-	-	-	-	-	-	-	-	-	-	-	-	-
	109	70	no	no	-	-	-	-	-	-	-	-	-	-	-	-	-	-	-	-	-	-	-	-
	110	71	no	no	-	-	-	-	-	-	-	-	-	-	-	-	-	-	-	-	-	-	-	-
	113	72	no	no	-	-	-	-	-	-	-	-	-	-	-	-	-	-	-	-	-	-	-	-
	114	73	yes	no	1	-	-	-	-	-	-	-	-	-	-	-	-	-	-	-	-	-	-	-
	116	74	yes	no	-	-	-	13	-	-	2	-	-	-	-	-	-	-	-	-	-	-	-	-
	117	75	yes	no	-	-	-	1	-	-	-	-	-	-	-	-	-	-	-	-	-	-	-	-
	123	76	yes	no	-	-	-	-	-	-	-	-	-	-	-	-	2	-	-	-	-	-	-	-
	124	77	no	no	-	-	-	-	-	-	-	-	-	-	-	-	-	-	-	-	1	-	-	-
	130	78	no	no	-	-	-	-	-	-	-	-	-	-	-	-	-	-	-	-	-	-	-	-
	131	79	no	no	-	-	-	-	-	-	-	-	-	-	-	-	-	-	-	-	-	-	-	-
	132	80	no	no	-	-	-	-	-	-	-	-	-	-	-	-	-	-	-	-	-	-	-	-
	133	81	yes	no	1	-	-	1	-	-	-	-	-	-	-	-	-	1	-	-	-	-	-	-
	134	82	no	no	-	-	-	-	-	-	-	-	-	-	-	-	-	-	-	-	-	-	-	-
	135	83	no	no	-	-	-	-	-	-	-	-	-	-	-	-	-	-	-	-	-	-	-	-
	138	84	yes	no	-	-	-	3	-	-	-	-	-	-	10	-	-	-	-	4	-	-	-	OH-bands present in apatite/monazite spectra
	139	85	no	no	-	-	-	-	-	-	-	-	-	-	-	-	-	-	-	-	1	-	-	-
	140	86	no	no	-	-	-	-	-	-	-	-	-	-	-	-	-	-	-	-	-	-	-	-
	141	87	yes	no	1	-	-	-	-	-	-	-	-	-	-	-	-	-	-	-	-	-	-	-
	142	88	yes	no	-	-	-	1	-	-	-	-	-	-	-	-	1	-	-	-	-	-	kyanite + rutile (1)	-
	143	89	yes	no	1	-	-	>20	-	-	-	-	-	-	-	-	-	3	-	1	-	brookite (1)	zircon + brookite (1)	-
	144	90	yes	no	-	-	-	1	-	-	-	-	-	-	-	-	-	-	-	-	-	-	-	-
	145	91	yes	no	-	-	-	-	-	-	-	-	1	-	-	-	-	-	-	-	-	-	-	-
	147	92	no	no	-	-	-	-	-	-	-	-	-	-	-	-	-	-	-	-	-	-	-	-
	148	93	no	no	-	-	-	-	-	-	-	-	-	-	-	-	-	-	-	-	-	-	-	-
	149	94	no	no	-	-	-	-	-	-	-	-	-	-	-	-	-	-	-	-	-	-	-	-
	151	95	no	no	-	-	-	-	-	-	-	-	-	-	-	-	-	-	-	-	-	-	-	-
	152	96	yes	no	-	-	-	-	-	-	-	-	1	-	-	-	-	-	-	-	-	-	-	-
	153	97	yes	no	-	-	-	>20	-	-	-	-	2	-	-	-	2	10	-	3	-	brookite (at surface)	zircon + rutile (7)	one apatite/monazite = monazite(Ce)
	154	98	no	no	-	-	-	-	-	-	-	-	-	-	-	-	-	-	-	-	-	-	-	-
	155	99	no	no	-	-	-	-	-	-	-	-	-	-	-	-	-	-	-	-	1	-	-	opaque: probably arzakite
	156	100	no	no	-	-	-	-	-	-	-	-	-	-	-	-	-	-	-	-	-	-	-	-
	157	101	no	no	-	-	-	-	-	-	-	-	-	-	-	-	-	-	-	-	-	-	-	-
	158	102	yes	no	-	-	-	-	-	-	-	-	-	-	-	-	-	1	-	-	-	-	-	-
	159	103	yes	no	-	-	-	-	-	-	-	-	-	-	-	-	-	1	-	-	-	-	-	-
	160	104	no	no	-	-	-	-	-	-	-	-	-	-	-	-	-	-	at surface	-	-	anatase (at surface)	-	healed fractures with CO2 inclusions
	165	105	no	no	-	-	-	-	-	-	-	-	-	-	-	-	-	-	-	-	-	-	-	-
	166	106	yes	no	-	-	-	9	-	-	-	-	-	-	-	-	1	-	-	-	-	-	kyanite + rutile (1)	-
	167	107	no	no	-	-	-	-	-	-	-	-	-	-	-	-	-	-	-	-	-	-	-	-
	168	108	no	no	-	-	-	-	-	-	-	-	-	-	-	-	-	-	-	-	-	-	-	-
	169	109	yes	no	-	-	-	6	-	-	-	-	1	-	-	-	5	1	-	-	-	gypsum (at surface)	kyanite + rutile (5) zircon + rutile (1)	-
	171	110	no	no	-	-	-	-	-	-	-	-	-	-	-	-	-	-	-	-	-	-	-	-
	172	111	no	no	-	-	-	-	-	-	-	-	-	-	-	-	-	-	-	-	-	-	-	-
	173	112	yes	no	-	-	-	1	-	-	-	-	-	-	-	-	-	-	-	-	-	-	-	-
	174	113	yes	no	-	-	-	14	-	1	-	-	-	-	-	-	-	4	-	1	-	-	-	-
	175	114	no	no	-	-	-	-	-	-	-	-	-	-	-	-	-	-	-	-	-	-	-	-
	176	115	yes	no	-	-	-	1	-	-	-	-	-	-	-	-	-	-	-	-	-	-	-	-
	177	116	no	no	-	-	-	-	-	-	-	-	-	-	-	-	-	-	-	-	-	-	-	-
	178	117	yes	no	-	-	-	>20	-	-	>20	-	-	-	-	-	-	>20	-	10	-	-	-	hundreds of rutile and graphite inclusions; two apatite/monazite = monazite(Ce)
	179	118	no	no	-	-	-	-	-	-	-	-	-	-	-	-	-	-	-	-	-	-	-	-
	180	119	yes	no	-	-	-	12	-	-	-	-	-	-	-	-	-	1	-	-	-	-	-	-
	181	120	no	no	-	-	-	-	-	-	-	-	-	-	-	-	-	-	-	-	-	-	-	-
	182	121	yes	no	-	-	-	2	-	-	-	-	-	-	-	-	-	-	-	-	-	-	-	-
	183	122	yes	no	1	-	-	2	-	>20	-	-	-	-	-	-	-	12	-	-	-	amphibole (1)	-	plagioclase inclusions in a healed fracture
	184	123	yes	no	1	-	-	-	-	-	-	-	-	-	-	-	-	-	-	-	1	-	-	-
	188	124	no	no	-	-	-	-	-	-	-	-	-	-	-	-	-	-	-	-	-	-	-	-
	189	125	yes	no	-	-	-	>20	-	-	-	-	-	-	-	-	-	1	at surface	-	4	-	-	opaque: probably molybdenite
	190	126	yes	no	-	-	-	-	-	-	1	-	-	-	-	1	-	1	-	-	-	-	-	-
	191	127	no	no	-	-	-	-	-	-	-	-	-	-	-	-	-	-	-	-	-	-	-	-
	192	128	yes	no	-	-	-	-	-	-	-	-	-	-	-	-	-	-	-	1	-	-	-	-
	193	129	no	no	-	-	-	-	-	-	-	-	-	-	-	-	-	-	-	-	-	-	-	-
	195	130	yes	no	-	-	-	2	-	-	-	-	-	-	-	-	-	-	-	-	-	-	-	-
	196	131	no	no	-	-	-	-	-	-	-	-	-	-	-	-	-	-	-	-	-	-	-	-
	198	132	yes	no	-	-	-	-	-	-	-	-	-	-	-	-	1	-	-	-	1	-	-	-
	199	133	yes	no	-	-	-	2	-	-	-	-	-	-	-	-	-	-	-	-	-	-	-	-
	200	134	no	no	-	-	-	-	-	-	-	-	-	-	-	-	-	-	-	-	-	-	-	-
	201	135	no	no	-	-	-	-	-	-	-	-	-	-	-	-	-	-	-	-	-	-	-	-
	202	136	yes	no	-	-	-	-	-	-	-	-	-	-	-	-	-	-	-	1	-	-	-	-
	203	137	yes	no	-	-	-	3	-	-	-	-	-	-	-	-	-	1	-	1	-	-	-	-
	204	138	yes	no	-	-	-	>20	-	-	-	-	-	-	1	-	-	-	-	-	-	-	-	-
	206	139	yes	no	-	-	-	-	-	-	1	-	-	-	-	-	-	6	-	2	1	-	-	-
	208	140	no	no	-	-	-	-	-	-	-	-	-	-	-	-	-	-	-	-	-	-	-	-
	209	141	no	no	-	-	-	-	-	-	-	-	-	-	-	-	-	-	-	-	-	-	-	-
	210	142	no	no	-	-	-	-	-	-	-	-	-	-	-	-	-	-	-	-	-	-	-	-
	211	143	no	no	-	-	-	-	-	-	-	-	-	-	-	-	-	-	-	-	-	-	-	-
	212	144	no	no	-	-	-	-	-	-	-	-	-	-	-	-	-	-	-	-	-	-	-	lithoclast: garnet + carbonate mineral
	213	145	no	no	-	-	-	-	-	-	-	-	-	-	-	-	-	-	-	-	-	-	-	-
	214	146	no	no	-	-	-	-	-	-	-	-	-	-	-	-	-	-	-	-	-	-	-	-
	215	147	no	no	-	-	-	-	-	-	-	-	-	-	-	-	-	-	-	-	-	-	-	-
	216	148	yes	no	-	-	-	-	-	-	2	-	1	-	-	-	-	-	-	4	-	-	graphite + apatite/monazite + muscovite-paragonite (1)	-
	221	149	yes	no	-	-	-	-	-	-	-	-	1	-	-	-	-	-	-	-	-	-	-	-
	222	150	yes	no	3	-	-	-	-	-	-	-	-	-	-	-	-	-	-	-	-	-	-	-
	223	151	no	no	-	-	-	-	-	-	-	-	-	-	-	-	-	-	-	-	-	-	-	-
	224	152	yes	no	-	-	-	11	-	-	-	-	-	-	1	-	-	4	-	-	-	-	-	-
	225	153	no	no	-	-	-	-	-	-	-	-	-	-	-	-	-	-	-	-	-	-	-	-
	226	154	yes	no	-	-	-	-	-	-	-	-	-	1	-	-	3	2	-	1	1	-	-	-
	227	155	yes	no	-	-	-	1	-	-	1	-	-	-	-	-	2	2	-	-	-	-	-	-
	230	156	yes	no	-	-	-	5	-	-	-	-	-	-	-	-	-	-	-	-	-	anatase (at surface)	-	-
	231	157	no	no	-	-	-	-	-	-	-	-	-	-	-	-	-	-	-	-	1	-	-	-
	232	158	yes	no	-	-	-	-	-	-	>20	-	-	-	3	-	-	>20	-	-	-	-	-	-
	233	159	yes	no	-	-	-	1	-	-	-	-	-	-	-	-	-	-	-	-	-	-	-	-
	234	160	yes	no	-	-	-	1	2	-	-	-	1	-	-	-	-	-	-	-	-	-	-	-
	235	161	no	no	-	-	-	-	-	-	-	-	-	-	-	-	-	-	-	-	-	-	-	lithoclast: garnet + quartz
	237	162	yes	no	-	-	-	-	-	-	-	-	-	-	-	-	-	-	-	2	2	-	-	-
	238	163	no	no	-	-	-	-	-	-	-	-	-	-	-	-	-	-	-	-	-	-	-	-
	239	164	no	no	-	-	-	-	-	-	-	-	-	-	-	-	-	-	-	-	-	-	-	-
	240	165	yes	no	-	-	-	-	-	-	-	-	-	-	-	-	-	1	-	-	-	-	-	-
	241	166	no	no	-	-	-	-	-	-	-	-	-	-	-	-	-	-	-	-	-	-	-	-
	242	167	yes	no	-	-	-	1	-	-	-	-	-	-	-	-	-	1	-	-	-	-	-	-
	243	168	no	no	-	-	-	-	-	-	-	-	-	-	-	-	-	-	-	-	-	-	-	-
	244	169	no	no	-	-	-	-	-	-	-	-	-	-	-	-	-	-	-	-	-	-	-	-
	246	170	yes	no	-	-	-	>20	-	-	-	-	-	-	-	-	-	-	-	1	-	-	-	most rutile inclusions <2µm; apatite/monazite = monazite(Ce)
	247	171	no	no	-	-	-	-	-	-	-	-	-	-	-	-	-	-	at surface	-	-	unknown (1)	-	-
	249	172	no	no	-	-	-	-	-	-	-	-	-	-	-	-	-	-	-	-	-	-	-	-
	250	173	no	no	-	-	-	-	-	-	-	-	-	-	-	-	-	-	-	-	-	-	-	-
	252	174	yes	no	-	-	-	4	-	-	3	-	-	-	-	-	-	-	-	-	-	-	-	-
	253	175	no	no	-	-	-	-	-	-	-	-	-	-	-	-	-	-	-	-	-	-	-	-
	254	176	no	no	-	-	-	-	-	-	-	-	-	-	-	-	-	-	-	-	-	-	-	-
	255	177	no	no	-	-	-	-	-	-	-	-	-	-	-	-	-	-	-	-	-	-	-	-
	257	178	yes	no	-	-	-	>20	-	-	-	-	-	-	-	-	-	1	at surface	2	-	-	-	-
	258	179	no	no	-	-	-	-	-	-	-	-	-	-	-	-	-	-	-	-	-	-	-	-
	260	180	no	no	-	-	-	-	-	-	-	-	-	-	-	-	-	-	-	-	-	-	-	-
	265	181	no	no	-	-	-	-	-	-	-	-	-	-	-	-	-	-	-	-	1	-	-	opaque = probably molybdenite
	266	182	no	no	-	-	-	-	-	-	-	-	-	-	-	-	-	-	at surface	-	-	-	-	-
	267	183	no	no	-	-	-	-	-	-	-	-	-	-	-	-	-	-	-	-	-	-	-	-
	270	184	no	no	-	-	-	-	-	-	-	-	-	-	-	-	-	-	-	-	-	-	-	-
	271	185	yes	no	-	-	-	1	-	-	-	-	-	-	-	-	-	4	-	1	-	-	-	-
	272	186	yes	yes	-	2	-	3	-	-	-	-	-	-	-	-	2	2	-	5	-	-	kyanite + rutile (1)	two apatite/monazite = monazite(Ce)
	273	187	no	no	-	-	-	-	-	-	-	-	-	-	-	-	-	-	-	-	-	-	-	-
	274	188	yes	no	-	-	-	2	-	-	-	-	-	-	-	-	-	-	-	-	-	-	-	-
	275	189	yes	no	-	-	-	1	-	-	-	-	-	-	-	-	-	-	-	-	-	-	-	-
	276	190	no	no	-	-	-	-	-	-	-	-	-	-	-	-	-	-	-	-	-	-	-	-
	277	191	yes	no	-	-	-	-	-	-	2	-	-	-	-	-	-	-	-	-	-	-	-	-
	278	192	yes	no	-	-	-	>20	-	-	-	-	-	-	-	-	-	-	-	-	-	-	-	-
	280	193	yes	no	1	-	-	-	-	-	-	-	-	-	-	-	-	-	-	-	-	-	-	-
	281	194	yes	no	-	-	-	2	-	-	-	-	-	-	-	-	-	2	-	1	-	-	-	-
	282	195	yes	no	-	-	-	1	-	-	-	-	-	-	-	-	-	-	-	-	-	-	-	-
	283	196	no	no	-	-	-	-	-	-	-	-	-	-	-	-	-	-	-	-	-	-	-	-
	285	197	yes	no	-	-	-	1	-	-	-	-	-	-	-	-	-	-	-	-	-	-	-	-
	286	198	no	no	-	-	-	-	-	-	-	-	-	-	-	-	-	-	-	-	-	-	-	-
	287	199	yes	no	-	-	-	-	-	-	-	-	-	-	-	-	-	2	-	-	-	-	-	lithoclast: garnet + plagioclase
	288	200	yes	no	-	-	-	4	-	-	-	-	-	-	-	-	-	-	-	-	4	-	-	-
		200	100	2	16	2	1	60	2	3	13	0	9	1	7	1	16	37	1	27	17	11	13
	Results: JS-Erz-9s 125-250 µm
	Grain number	Garnet number	Inclusions ≥2 µm	UHP inclusions	oxides				feldspars		carbon polymorphs		micas		pyroxenes	nesosilicates			carbonate minerals	apatite/ monazite	opaque	others	polyphase inclusions	remarks
					quartz	coesite	cristobalite	rutile	alkali feldspar	plagioclase	graphite	diamond	muscovite-paragonite	phlogopite-biotite	omphacite	titanite	kyanite	zircon
	1	1	yes	no	1	-	-	-	-	-	-	-	-	-	-	-	-	-	-	-	-	-	-	-
	2	2	no	no	-	-	-	-	-	-	-	-	-	-	-	-	-	-	-	-	-	-	-	-
	3	3	no	no	-	-	-	-	-	-	-	-	-	-	-	-	-	-	-	-	-	-	-	-
	4	4	yes	no	1	-	-	1	-	-	1	-	1	1	-	-	-	-	1	-	-	-	graphite + phlogopite-biotite + quartz (1) muscovite-paragonite + carbonate mineral (1)	-
	5	5	no	no	-	-	-	-	-	-	-	-	-	-	-	-	-	-	-	-	2	-	-	-
	6	6	no	no	-	-	-	-	-	-	-	-	-	-	-	-	-	-	-	-	-	-	-	-
	7	7	no	no	-	-	-	-	-	-	-	-	-	-	-	-	-	-	-	-	-	-	-	-
	8	8	yes	no	-	-	-	4	-	-	-	-	-	-	-	-	-	-	-	-	-	-	-	many inclusions <2 µm
	9	9	yes	no	-	-	-	1	-	-	-	-	-	-	-	-	-	-	-	-	-	-	-	-
	10	10	yes	no	1	-	-	-	-	-	-	-	-	-	-	-	-	-	at surface	-	-	-	-	-
	11	11	yes	no	2	-	-	-	-	-	-	-	-	-	-	-	-	-	-	-	-	phyllosilicate (1)	-	-
	12	12	yes	yes	-	-	-	-	-	-	-	1	-	-	-	-	-	-	-	-	-	-	-	-
	13	13	yes	yes	-	-	-	-	-	-	-	1	-	-	-	-	-	-	-	-	-	-	-	-
	14	14	no	no	-	-	-	-	-	-	-	-	-	-	-	-	-	-	-	-	-	-	-	-
	15	15	yes	no	-	-	-	-	1	-	-	-	-	-	-	-	-	-	-	-	-	-	-	-
	16	16	yes	no	-	-	-	-	-	-	-	-	-	-	-	-	-	-	at surface	>20	-	-	-	hundreds of apatite/monazite inclusions
	17	17	yes	no	-	-	-	-	1	-	-	-	-	-	-	-	-	-	-	-	-	-	-	-
	18	18	yes	no	-	-	-	-	-	-	-	-	-	1	-	-	-	-	-	-	-	-	-	-
	19	19	yes	no	-	-	2	6	-	-	-	-	-	-	-	-	-	-	-	-	-	talc (2)	-	-
	20	20	no	no	-	-	-	-	-	-	-	-	-	-	-	-	-	-	-	-	-	-	-	-
	21	21	no	no	-	-	-	-	-	-	-	-	-	-	-	-	-	-	-	-	-	-	-	-
	22	22	yes	yes	1	-	-	4	-	-	-	2	-	-	-	-	-	-	-	1	-	-	diamond + apatite/monazite + quartz + rutile (1)	-
	23	23	yes	no	-	-	-	3	-	-	-	-	-	-	-	-	-	-	-	-	-	-	-	-
	24	24	yes	no	-	-	1	>20	-	-	-	-	-	1	-	-	-	-	-	1	-	-	apatite/monazite + phlogopite-biotite + cristobalite (1)	-
	25	25	yes	no	5	-	-	17	-	-	-	-	-	1	-	-	7	-	-	2	-	-	quartz + rutile (2) phlogopite-biotite + rutile (1) kyanite + rutile (1) kyanite + quartz (1) kyanite + quartz + rutile (1)	-
	26	26	yes	no	1	-	-	2	-	-	-	-	-	-	-	-	-	-	-	-	-	-	-	-
	27	27	yes	no	-	-	-	4	-	-	-	-	-	-	-	-	-	-	-	-	-	-	-	-
	28	28	yes	no	1	-	-	-	-	-	-	-	-	-	-	-	-	-	-	-	-	amphibole (1)	-	-
	29	29	no	no	-	-	-	-	-	-	-	-	-	-	-	-	-	-	-	-	-	-	-	-
	30	30	yes	no	-	-	-	2	-	-	-	-	-	-	-	-	-	-	-	-	-	-	-	-
	31	31	no	no	-	-	-	-	-	-	-	-	-	-	-	-	-	-	at surface	-	-	-	-	-
	32	32	yes	yes	-	-	-	1	-	1	1	1	-	1	-	-	-	-	-	-	-	-	diamond + graphite + phlogopite-biotite + plagioclase + rutile (1)	-
	33	33	no	no	-	-	-	-	-	-	-	-	-	-	-	-	-	-	-	-	-	-	-	-
	34	34	no	no	-	-	-	-	-	-	-	-	-	-	-	-	-	-	-	-	-	-	-	-
	35	35	yes	no	13	-	-	-	-	-	-	-	-	-	-	-	-	-	-	-	-	-	-	-
	36	36	yes	no	-	-	-	-	-	-	1	-	-	-	-	-	-	-	-	1	-	-	-	-
	37	37	yes	no	-	-	-	-	-	-	-	-	-	-	-	-	-	-	at surface	5	-	-	-	-
	38	38	no	no	-	-	-	-	-	-	-	-	-	-	-	-	-	-	-	-	-	-	-	-
	39	39	no	no	-	-	-	-	-	-	-	-	-	-	-	-	-	-	-	-	-	-	-	many inclusions <2 µm
	40	40	yes	no	-	-	-	2	-	-	-	-	-	-	-	-	-	-	-	-	-	-	-	-
	41	41	yes	no	-	-	-	-	-	-	-	-	-	1	-	-	-	-	-	1	-	-	-	no OH-bands detected in apatite/monazite spectrum
	42	42	yes	no	-	-	-	2	-	-	-	-	-	-	-	-	-	-	-	-	-	-	-	-
	43	43	yes	no	2	-	-	2	-	-	-	-	-	-	-	-	-	-	-	-	-	-	-	-
	44	44	yes	no	-	-	-	4	-	-	-	-	-	-	-	-	-	-	-	-	-	-	-	-
	45	45	no	no	-	-	-	-	-	-	-	-	-	-	-	-	-	-	-	-	-	-	-	-
	46	46	no	no	-	-	-	-	-	-	-	-	-	-	-	-	-	-	-	-	-	-	-	many inclusions <2 µm
	47	47	no	no	-	-	-	-	-	-	-	-	-	-	-	-	-	-	-	-	-	-	-	-
	48	48	yes	no	1	-	-	3	-	-	-	-	-	1	-	-	-	-	-	-	-	brookite (at surface)	phlogopite-biotite + quartz + rutile (1)	-
	49	49	yes	no	3	-	-	-	-	-	-	-	1	-	-	-	-	-	-	-	4	-	-	-
	50	50	no	no	-	-	-	-	-	-	-	-	-	-	-	-	-	-	-	-	-	-	-	-
	51	51	no	no	-	-	-	-	-	-	-	-	-	-	-	-	-	-	-	-	-	-	-	-
	52	52	no	no	-	-	-	-	-	-	-	-	-	-	-	-	-	-	-	-	-	-	-	-
	53	53	no	no	-	-	-	-	-	-	-	-	-	-	-	-	-	-	-	-	-	-	-	-
	54	54	yes	no	1	-	-	>20	-	-	-	-	-	-	-	-	-	-	-	-	-	brookite (at surface)	-	many inclusions <2 µm
	55	55	yes	no	-	-	-	-	-	-	-	-	1	-	-	-	-	-	-	-	-	-	-	-
	56	56	no	no	-	-	-	-	-	-	-	-	-	-	-	-	-	-	-	-	-	-	-	-
	57	57	no	no	-	-	-	-	-	-	-	-	-	-	-	-	-	-	-	-	-	-	-	-
	58	58	yes	no	-	-	-	2	-	-	-	-	1	-	-	-	-	-	1	-	-	-	muscovite-paragonite + carbonate mineral	-
	59	59	yes	no	-	-	-	-	-	-	1	-	-	-	-	-	-	-	-	-	-	-	-	-
	60	60	yes	no	-	-	-	9	-	-	1	-	-	-	-	-	-	-	-	-	-	-	graphite + rutile	-
	61	61	yes	no	-	-	-	-	-	-	1	-	-	-	-	-	-	-	-	-	-	-	-	-
	62	62	no	no	-	-	-	-	-	-	-	-	-	-	-	-	-	-	-	-	-	-	-	-
	63	63	yes	no	-	-	-	3	-	-	-	-	1	1	-	-	-	-	-	-	-	-	-	-
	64	64	yes	no	-	-	-	5	-	-	1	-	-	1	-	-	-	-	-	-	-	-	-	-
	65	65	yes	yes	-	-	-	5	-	-	-	4	-	-	-	-	-	-	-	-	-	-	-	many inclusions <2 µm
	66	66	yes	yes	-	-	-	-	-	-	1	2	-	-	-	-	-	-	-	-	-	-	-	-
	67	67	yes	no	4	-	-	1	-	-	-	-	-	-	-	-	-	-	at surface	-	-	-	-	-
	68	68	no	no	-	-	-	-	-	-	-	-	-	-	-	-	-	-	-	-	-	-	-	-
	69	69	no	no	-	-	-	-	-	-	-	-	-	-	-	-	-	-	-	-	-	-	-	-
	70	70	no	no	-	-	-	-	-	-	-	-	-	-	-	-	-	-	-	-	-	-	-	-
	71	71	yes	no	-	-	-	>20	-	-	-	-	-	-	-	-	-	-	-	-	-	-	-	-
	72	72	yes	yes	3	-	1	8	-	-	-	1	-	2	-	-	-	-	-	-	-	brookite (at surface) unknown (1)	quartz + rutile (1) phlogopite-biotite + quartz (1) phlogopite-biotite + quartz + rutile (1)	-
	73	73	yes	no	-	-	-	4	-	-	-	-	-	-	-	-	-	-	-	-	-	-	-	-
	74	74	no	no	-	-	-	-	-	-	-	-	-	-	-	-	-	-	-	-	-	-	-	-
	75	75	no	no	-	-	-	-	-	-	-	-	-	-	-	-	-	-	-	-	-	-	-	-
	76	76	yes	no	1	-	1	12	-	-	-	-	-	1	-	-	-	-	-	-	-	-	-	-
	77	77	no	no	-	-	-	-	-	-	-	-	-	-	-	-	-	-	-	-	-	-	-	-
	78	78	yes	no	-	-	-	>20	-	-	-	-	-	-	-	-	-	-	-	-	-	-	-	-
	79	79	yes	no	1	-	-	3	-	-	2	-	-	-	-	-	-	-	-	-	-	-	-	-
	80	80	yes	no	-	-	-	5	-	-	-	-	-	-	-	-	-	-	-	-	-	-	-	-
	81	81	yes	no	-	-	-	3	-	-	-	-	-	-	-	-	-	-	-	-	-	-	-	-
	82	82	yes	no	-	-	-	6	-	-	-	-	-	-	-	-	-	-	-	-	-	-	-	-
	83	83	yes	yes	-	-	-	-	-	-	1	2	-	2	-	-	-	-	-	-	-	-	diamond + phlogopite-biotite (1) diamond + graphite (1)	-
	84	84	no	no	-	-	-	-	-	-	-	-	-	-	-	-	-	-	-	-	-	-	-	-
	85	85	yes	no	1	-	-	-	1	-	-	-	-	-	-	-	1	-	-	-	-	-	-	-
	86	86	yes	yes	4	-	-	>20	-	-	10	5	-	2	-	-	1	-	-	1	-	unknown (1)	graphite + rutile (1) graphite + apatite/monazite (1) graphite + kyanite + quartz (1) graphite + quartz + rutile (1) graphite + phlogopite-biotite + quartz + rutile (1) diamond + graphite + rutile (1) diamond + phlogopite-biotite + quartz (1) diamond + graphite (2)	-
	87	87	yes	no	1	-	-	4	-	-	2	-	-	-	-	-	-	-	-	-	-	-	graphite + quartz + rutile (1)	-
	88	88	yes	yes	-	-	-	10	-	-	1	6	-	-	-	-	-	-	at surface	-	-	-	diamond + rutile (1) diamond + graphite (1)	many inclusions <2 µm
	89	89	no	no	-	-	-	-	-	-	-	-	-	-	-	-	-	-	-	-	-	-	-	-
	90	90	no	no	-	-	-	-	-	-	-	-	-	-	-	-	-	-	-	-	-	-	-	-
	91	91	no	no	-	-	-	-	-	-	-	-	-	-	-	-	-	-	-	-	-	-	-	-
	92	92	no	no	-	-	-	-	-	-	-	-	-	-	-	-	-	-	-	-	1	-	-	-
	93	93	yes	yes	-	-	-	>20	-	-	-	1	-	-	-	-	-	-	-	-	-	-	diamond + rutile (1)	-
	94	94	yes	yes	-	-	-	8	-	-	1	2	-	-	-	-	-	-	-	1	-	-	diamond + rutile (1) graphite + rutile (1)	-
	95	95	yes	no	-	-	-	1	-	-	-	-	-	-	-	-	-	-	-	-	-	-	-	-
	96	96	no	no	-	-	-	-	-	-	-	-	-	-	-	-	-	-	-	-	-	-	-	-
	97	97	yes	no	1	-	-	4	-	-	-	-	-	-	-	-	2	-	-	-	-	-	-	-
	98	98	no	no	-	-	-	-	-	-	-	-	-	-	-	-	-	-	-	-	-	-	-	-
	99	99	no	no	-	-	-	-	-	-	-	-	-	-	-	-	-	-	-	-	-	-	-	-
	100	100	yes	no	-	-	-	3	-	-	-	-	-	1	-	-	-	-	-	-	-	-	phlogopite-biotite + rutile (1)	-
	101	101	yes	no	-	-	-	3	-	-	-	-	-	-	-	-	-	-	-	-	-	-	-	-
	102	102	no	no	-	-	-	-	-	-	-	-	-	-	-	-	-	-	-	-	-	-	-	-
	103	103	yes	no	1	-	-	-	-	-	-	-	-	-	-	-	-	-	-	-	-	-	-	-
	104	104	yes	no	-	-	-	1	-	-	-	-	-	-	-	-	-	-	-	-	-	-	-	-
	105	105	yes	no	1	-	-	4	-	-	1	-	-	-	-	-	-	-	-	-	-	-	graphite + quartz (1)	-
	106	106	yes	no	-	-	-	-	-	-	-	-	-	-	-	-	-	-	-	2	-	-	-	-
	107	107	yes	yes	-	-	-	>20	-	-	-	1	-	-	-	-	-	-	-	-	3	-	-	-
	108	108	yes	no	-	-	-	2	-	-	-	-	-	-	-	-	-	-	-	-	-	-	-	-
	109	109	yes	no	-	-	-	5	-	-	-	-	-	-	-	-	-	-	-	-	-	-	-	-
	110	110	yes	yes	1	-	6	>20	-	-	1	1	-	1	-	-	-	-	-	-	-	phyllosilicate (3) talc (2)	phyllosilicate + cristobalite (1) talc + rutile (2) cristobalite + rutile (1) diamond + phlogopite-biotite + quartz (1)	-
	111	111	yes	no	-	-	-	2	-	-	-	-	-	-	-	-	-	-	-	-	-	-	-	many inclusions <2 µm
	112	112	yes	yes	-	-	-	>20	-	-	-	1	-	-	-	-	-	-	-	-	-	-	-	-
	113	113	no	no	-	-	-	-	-	-	-	-	-	-	-	-	-	-	-	-	-	-	-	-
	114	114	no	no	-	-	-	-	-	-	-	-	-	-	-	-	-	-	-	-	-	-	-	-
	115	115	no	no	-	-	-	-	-	-	-	-	-	-	-	-	-	-	-	-	-	-	-	-
	116	116	no	no	-	-	-	-	-	-	-	-	-	-	-	-	-	-	-	-	-	-	-	-
	117	117	no	no	-	-	-	-	-	-	-	-	-	-	-	-	-	-	-	-	-	-	-	-
	118	118	no	no	-	-	-	-	-	-	-	-	-	-	-	-	-	-	-	-	-	-	-	-
	119	119	yes	yes	-	-	-	8	-	-	2	1	-	-	-	-	-	-	-	-	-	-	-	-
	120	120	yes	yes	3	-	-	6	-	-	1	3	-	-	-	-	-	-	-	-	-	phyllosilicate (2)	diamond + graphite + rutile (1) diamond + phyllosilicate + quartz (1) diamond + phyllosilicate + rutile (1)	-
	121	121	no	no	-	-	-	-	-	-	-	-	-	-	-	-	-	-	-	-	-	-	-	-
	122	122	yes	no	-	-	-	-	-	-	1	-	-	-	-	-	-	-	-	-	-	-	-	-
	123	123	yes	yes	-	-	-	12	-	-	-	1	-	-	-	-	-	-	-	-	-	-	-	-
	124	124	yes	yes	4	-	-	>20	-	-	3	1	1	-	-	-	-	-	1	-	-	phyllosilicate (1)	graphite + quartz + rutile (1) graphite + muscovite-paragonite (1) graphite + rutile (1) diamond + phyllosilicate + rutile (1)	-
	125	125	yes	no	-	-	-	2	-	-	-	-	-	-	-	-	-	-	-	-	-	-	-	-
	126	126	no	no	-	-	-	-	-	-	-	-	-	-	-	-	-	-	-	-	-	-	-	-
	127	127	no	no	-	-	-	-	-	-	-	-	-	-	-	-	-	-	-	-	-	-	-	-
	128	128	yes	no	1	-	-	>20	-	-	-	-	-	-	-	-	-	-	-	1	-	phyllosilicate (1)	apatite/monazite + phyllosilicate	-
	129	129	no	no	-	-	-	-	-	-	-	-	-	-	-	-	-	-	-	-	-	-	-	-
	131	130	no	no	-	-	-	-	-	-	-	-	-	-	-	-	-	-	-	-	-	-	-	-
	132	131	no	no	-	-	-	-	-	-	-	-	-	-	-	-	-	-	-	-	-	-	-	-
	133	132	yes	no	-	-	-	14	-	-	1	-	-	-	-	-	-	-	-	-	-	-	-	-
	134	133	yes	no	1	-	-	8	-	-	-	-	-	-	-	-	-	-	-	-	-	anatase (1)	-	-
	135	134	yes	yes	-	-	-	1	-	-	-	1	-	-	-	-	-	-	-	-	-	phyllosilicate (1)	diamond + phyllosilicate (1)	-
	136	135	yes	no	-	-	-	2	-	-	-	-	-	-	-	-	-	-	-	-	-	-	-	-
	137	136	yes	no	-	-	-	16	-	-	-	-	-	1	-	-	-	-	-	-	-	brookite (1)	phlogopite-biotite + brookite (1)	-
	138	137	yes	no	-	-	-	6	-	-	-	-	-	-	-	-	-	-	-	-	-	-	-	-
	139	138	yes	no	-	-	-	-	-	-	-	-	-	-	-	-	-	-	-	4	1	-	-	many more needles of apatite/monazite <2 µm
	140	139	no	no	-	-	-	-	-	-	-	-	-	-	-	-	-	-	-	-	-	-	-	-
	141	140	yes	no	1	-	-	-	-	-	-	-	-	-	-	-	-	-	-	-	-	-	-	euhedral quartz inclusion (35 µm) with fractures
	142	141	yes	no	3	-	-	1	1	-	-	-	-	-	-	-	-	-	-	1	-	-	-	-
	143	142	no	no	-	-	-	-	-	-	-	-	-	-	-	-	-	-	-	-	-	-	-	-
	144	143	no	no	-	-	-	-	-	-	-	-	-	-	-	-	-	-	-	-	-	-	-	-
	145	144	no	no	-	-	-	-	-	-	-	-	-	-	-	-	-	-	-	-	-	-	-	-
	146	145	yes	no	-	-	-	-	-	-	1	-	-	-	-	-	-	-	-	1	-	-	-	many inclusions <2 µm
	147	146	no	no	-	-	-	-	-	-	-	-	-	-	-	-	-	-	-	-	-	-	-	-
	148	147	yes	no	-	-	-	4	-	-	-	-	-	-	-	-	-	-	-	-	-	-	-	-
	149	148	yes	no	1	-	-	-	-	-	3	-	-	-	-	-	-	-	-	2	-	-	-	-
	150	149	no	no	-	-	-	-	-	-	-	-	-	-	-	-	-	-	-	-	-	-	-	-
	151	150	no	no	-	-	-	-	-	-	-	-	-	-	-	-	-	-	-	-	-	-	-	-
	152	151	yes	no	1	-	-	-	-	-	1	-	-	-	-	-	-	-	-	-	-	-	-	-
	153	152	no	no	-	-	-	-	-	-	-	-	-	-	-	-	-	-	-	-	-	-	-	-
	154	153	yes	no	-	-	-	-	-	-	-	-	-	-	-	-	3	-	-	-	-	-	-	-
	155	154	no	no	-	-	-	-	-	-	-	-	-	-	-	-	-	-	-	-	-	-	-	-
	156	155	no	no	-	-	-	-	-	-	-	-	-	-	-	-	-	-	-	-	-	-	-	-
	157	156	yes	yes	-	-	-	-	-	-	-	2	-	1	-	-	-	-	-	-	-	-	diamond + phlogopite-biotite (1)	many inclusions <2 µm
	158	157	yes	no	-	-	-	16	-	-	-	-	-	-	-	-	-	-	-	1	-	-	-	-
	159	158	yes	yes	-	-	-	-	-	-	-	1	-	-	-	-	-	-	-	-	-	-	-	-
	160	159	no	no	-	-	-	-	-	-	-	-	-	-	-	-	-	-	-	-	-	-	-	-
	161	160	yes	no	-	-	-	-	1	-	-	-	-	-	-	-	-	-	-	-	-	-	-	-
	162	161	no	no	-	-	-	-	-	-	-	-	-	-	-	-	-	-	-	-	-	-	-	-
	163	162	no	no	-	-	-	-	-	-	-	-	-	-	-	-	-	-	-	-	-	-	-	-
	164	163	no	no	-	-	-	-	-	-	-	-	-	-	-	-	-	-	-	-	-	-	-	-
	165	164	yes	no	-	-	-	3	-	1	-	-	-	-	-	-	5	-	-	-	-	-	-	-
	166	165	no	no	-	-	-	-	-	-	-	-	-	-	-	-	-	-	-	-	-	-	-	-
	167	166	yes	no	-	-	-	-	-	-	-	-	-	-	-	-	-	-	-	2	-	-	-	-
		166	100	22	32	0	5	66	5	2	24	22	6	17	0	0	6	0	3	17	5	14	24
	Results: JS-Erz-13s 125-250 µm
	Grain number	Garnet number	Inclusions ≥2 µm	UHP inclusions	oxides				feldspars		carbon polymorphs		micas		pyroxenes	nesosilicates			carbonate minerals	apatite/ monazite	opaque	others	polyphase inclusions	remarks
					quartz	coesite	cristobalite	rutile	alkali feldspar	plagioclase	graphite	diamond	muscovite-paragonite	phlogopite-biotite	omphacite	titanite	kyanite	zircon
	1	1	yes	yes	-	2	-	5	-	-	-	-	5	-	-	-	3	5	-	2	-	anatase (at surface) brookite (1)	zircon + rutile (4)	-
	2	2	no	no	-	-	-	-	-	-	-	-	-	-	-	-	-	-	-	-	-	-	-	-
	3	3	yes	no	-	-	-	1	-	-	2	-	-	-	-	-	1	-	-	-	-	-	-	-
	4	4	yes	no	-	-	-	-	-	1	>20	-	1	-	-	2	-	-	-	8	-	-	-	-
	5	5	yes	no	-	-	-	1	-	-	1	-	-	-	-	-	2	1	-	-	-	-	graphite + zircon (1)	-
	6	6	no	no	-	-	-	-	-	-	-	-	-	-	-	-	-	-	-	-	-	-	-	-
	7	7	yes	no	-	-	-	1	-	-	-	-	-	-	-	-	-	2	-	-	-	-	-	-
	9	8	yes	no	-	-	-	>20	-	-	-	-	1	-	-	-	2	1	-	-	-	-	kyanite + rutile (2)	-
	10	9	yes	no	1	-	-	>20	-	-	-	-	-	-	-	-	-	2	-	-	-	-	-	-
	11	10	yes	no	1	-	-	>20	-	-	-	-	-	-	-	-	-	9	-	>20	-	-	-	many inclusions <2µm
	12	11	yes	no	-	-	-	5	-	-	-	-	-	-	-	-	3	1	-	-	2	-	kyanite + rutile (3)	-
	13	12	no	no	-	-	-	-	-	-	-	-	-	-	-	-	-	-	-	-	-	-	-	-
	15	13	yes	no	1	-	-	-	-	-	-	-	-	-	-	-	-	-	-	-	-	-	-	-
	18	14	no	no	-	-	-	-	-	-	-	-	-	-	-	-	-	-	-	-	-	-	-	-
	19	15	yes	no	-	-	-	>20	-	-	-	-	-	-	-	-	-	6	-	>20	1	-	-	OH-bands present in apatite/monazite spectra
	20	16	yes	no	-	-	-	1	-	2	-	-	-	-	-	-	-	-	-	2	1	-	-	opaque: probably allanite
	21	17	no	no	-	-	-	-	-	-	-	-	-	-	-	-	-	-	-	-	1	-	-	opaque: probably arzakite/hematite
	22	18	no	no	-	-	-	-	-	-	-	-	-	-	-	-	-	-	-	-	-	-	-	-
	23	19	yes	no	-	-	-	1	-	-	-	-	-	-	-	-	-	-	-	-	-	-	-	-
	24	20	no	no	-	-	-	-	-	-	-	-	-	-	-	-	-	-	-	-	-	-	-	lithoclast: garnet + opaque
	27	21	yes	no	-	-	-	18	-	-	2	-	-	-	-	-	-	2	-	-	-	-	-	-
	29	22	no	no	-	-	-	-	-	-	-	-	-	-	-	-	-	-	-	-	-	-	-	-
	30	23	yes	no	-	-	-	2	-	-	-	-	-	-	-	-	-	-	-	-	-	-	-	-
	31	24	yes	no	4	-	-	14	-	-	-	-	-	-	-	-	-	2	-	-	-	-	-	-
	32	25	yes	no	-	-	-	3	-	-	6	-	-	-	-	-	-	3	-	-	1	jadeite (1)	-	-
	33	26	no	no	-	-	-	-	-	-	-	-	-	-	-	-	-	-	-	-	-	-	-	-
	34	27	yes	no	-	-	-	1	-	-	-	-	-	-	-	-	-	-	-	-	-	-	-	-
	35	28	yes	yes	-	1	-	-	-	-	-	-	-	-	-	-	-	-	-	-	-	-	-	-
	38	29	yes	no	-	-	-	-	-	-	-	-	-	-	-	-	-	1	-	-	-	-	-	-
	41	30	yes	no	-	-	-	>20	-	-	-	-	-	-	-	-	-	-	-	-	-	-	-	many inclusions <2µm
	42	31	no	no	-	-	-	-	-	-	-	-	-	-	-	-	-	-	-	-	-	-	-	-
	43	32	no	no	-	-	-	-	-	-	-	-	-	-	-	-	-	-	-	-	-	-	-	-
	44	33	no	no	-	-	-	-	-	-	-	-	-	-	-	-	-	-	-	-	-	-	-	-
	46	34	yes	no	1	-	-	-	-	-	-	-	-	-	-	-	-	-	-	-	-	-	-	-
	48	35	yes	no	-	-	-	8	-	-	-	-	-	-	-	-	-	2	-	-	-	-	zircon + rutile (1)	-
	50	36	yes	no	-	-	-	-	-	-	-	-	-	-	-	-	-	1	-	-	-	-	-	-
	51	37	no	no	-	-	-	-	-	-	-	-	-	-	-	-	-	-	-	-	-	-	-	-
	52	38	yes	no	>20	-	-	>20	-	-	1	-	-	-	-	-	-	-	-	4	2	-	-	opaque: molybdenite
	53	39	no	no	-	-	-	-	-	-	-	-	-	-	-	-	-	-	-	-	-	-	-	-
	54	40	yes	no	-	-	-	3	-	1	-	-	2	-	-	-	4	5	-	2	-	-	kyanite + rutile (2) zircon + rutile (1)	-
	55	41	yes	no	-	-	-	-	-	-	-	-	-	-	-	-	-	1	-	-	-	-	-	-
	56	42	yes	no	-	-	-	>20	-	-	-	-	-	-	-	-	-	-	-	-	-	-	-	-
	57	43	yes	no	1	-	-	-	-	-	-	-	-	-	-	-	-	-	-	-	-	-	-	-
	58	44	yes	no	7	-	-	>20	-	-	13	-	-	-	-	1	-	1	-	1	-	-	-	-
	59	45	yes	no	-	-	-	>20	-	-	5	-	-	-	-	-	-	1	-	-	-	-	-	-
	60	46	yes	no	>20	-	-	>20	-	-	-	-	-	-	-	-	-	9	-	1	-	-	-	hundreds of inclusions (mainly rutile but also quartz); rutile and quartz inclusions are located in the center of the garnet host and zircon inclusions at the rim
	61	47	no	no	-	-	-	-	-	-	-	-	-	-	-	-	-	-	-	-	-	-	-	-
	62	48	no	no	-	-	-	-	-	-	-	-	-	-	-	-	-	-	-	-	-	-	-	-
	63	49	no	no	-	-	-	-	-	-	-	-	-	-	-	-	-	-	-	-	-	-	-	-
	64	50	no	no	-	-	-	-	-	-	-	-	-	-	-	-	-	-	-	-	-	-	-	-
	66	51	no	no	-	-	-	-	-	-	-	-	-	-	-	-	-	-	-	-	-	-	-	-
	67	52	yes	no	-	-	-	>20	-	-	-	-	-	-	-	-	-	4	-	4	-	-	-	hundreds of rutile inclusions
	68	53	yes	no	12	-	-	-	-	-	-	-	-	-	-	-	-	4	-	15	-	-	-	-
	69	54	yes	no	-	-	-	>20	-	-	-	-	-	-	-	-	-	2	-	3	-	-	-	thousands of rutile inclusions
	70	55	yes	no	2	-	-	>20	-	-	-	-	-	-	-	-	-	1	-	-	-	-	-	-
	71	56	no	no	-	-	-	-	-	-	-	-	-	-	-	-	-	-	-	-	-	-	-	-
	72	57	yes	no	-	-	-	-	-	-	-	-	2	-	-	-	-	-	-	-	-	-	-	-
	74	58	yes	no	-	-	-	-	-	-	-	-	-	-	-	-	-	1	-	-	-	-	-	-
	75	59	yes	no	-	-	-	-	-	-	-	-	1	-	-	-	-	-	-	1	-	-	-	-
	77	60	no	no	-	-	-	-	-	-	-	-	-	-	-	-	-	-	-	-	-	-	-	-
	78	61	yes	no	-	-	-	>20	-	-	-	-	-	-	-	-	-	-	-	-	-	-	-	-
	79	62	yes	no	-	-	-	>20	-	-	>20	-	-	-	-	-	-	2	-	-	-	-	-	-
	80	63	yes	no	-	-	-	1	-	-	-	-	-	-	-	-	-	-	4	2	-	-	-	-
	82	64	no	no	-	-	-	-	-	-	-	-	-	-	-	-	-	-	-	-	-	-	-	-
	83	65	no	no	-	-	-	-	-	-	-	-	-	-	-	-	-	-	-	-	-	-	-	-
	84	66	no	no	-	-	-	-	-	-	-	-	-	-	-	-	-	-	-	-	-	-	-	-
	85	67	yes	no	-	-	-	1	-	-	-	-	1	-	-	-	-	-	-	2	5	-	-	-
	87	68	yes	no	-	-	-	-	-	-	-	-	-	-	-	-	-	2	-	-	-	-	-	-
	90	69	no	no	-	-	-	-	-	-	-	-	-	-	-	-	-	-	-	-	-	-	-	-
	91	70	yes	no	-	-	-	-	-	-	-	-	-	-	-	-	-	1	-	-	-	-	-	-
	93	71	yes	no	-	-	-	16	-	-	-	-	-	-	-	-	-	5	-	1	-	-	-	-
	94	72	no	no	-	-	-	-	-	-	-	-	-	-	-	-	-	-	-	-	-	-	-	-
	95	73	yes	no	>20	-	-	1	-	-	-	-	-	-	-	-	-	-	-	-	-	-	-	many inclusions <2 µm; hundreds of quartz inclusions
	96	74	yes	no	-	-	-	2	-	-	-	-	-	-	-	-	-	1	-	-	-	gypsum (1)	-	-
	97	75	no	no	-	-	-	-	-	-	-	-	-	-	-	-	-	-	-	-	-	-	-	-
	98	76	no	no	-	-	-	-	-	-	-	-	-	-	-	-	-	-	-	-	-	-	-	-
	99	77	no	no	-	-	-	-	-	-	-	-	-	-	-	-	-	-	-	-	-	-	-	-
	100	78	yes	no	-	-	-	1	-	-	-	-	-	-	-	-	-	-	-	-	-	-	-	-
	103	79	yes	no	-	-	-	3	-	-	-	-	-	-	-	-	-	-	-	-	-	-	-	-
	104	80	yes	no	-	-	-	19	-	-	-	-	-	-	-	-	-	2	-	-	-	-	-	-
	105	81	yes	no	-	-	-	-	-	-	-	-	-	-	-	-	-	-	-	6	-	-	-	-
	107	82	yes	no	-	-	-	1	-	-	-	-	-	-	-	-	-	-	-	-	-	-	-	-
	108	83	no	no	-	-	-	-	-	-	-	-	-	-	-	-	-	-	-	-	-	gypsum (at surface)	-	-
	109	84	yes	no	1	-	-	>20	-	-	-	-	-	-	-	-	-	-	-	-	-	-	-	-
	110	85	no	no	-	-	-	-	-	-	-	-	-	-	-	-	-	-	-	-	-	-	-	-
	112	86	yes	no	1	-	-	3	-	-	-	-	-	-	-	-	-	2	-	>20	-	-	-	hundreds of apatite/monazite inclusions
	113	87	no	no	-	-	-	-	-	-	-	-	-	-	-	-	-	-	-	-	-	-	-	-
	114	88	yes	no	-	-	-	8	-	-	7	-	-	-	-	-	-	-	-	2	-	-	graphite + rutile (3)	-
	115	89	yes	no	-	-	-	>20	-	-	-	-	-	-	-	-	-	3	-	1	-	-	-	hundreds of rutile inclusions concentrated in the center
	116	90	yes	yes	-	1	-	1	-	-	-	-	-	-	-	-	-	4	-	5	1	-	zircon + rutile (1)	apatite/monazite = monazite(Ce); opaque: probably molybdenite
	117	91	yes	no	1	-	-	3	-	-	-	-	-	-	-	-	4	-	-	1	-	jadeite (1)	kyanite + rutile (3) kyanite + quartz (1)	-
	118	92	yes	no	-	-	-	>20	-	-	-	-	-	-	-	-	-	1	-	-	-	-	-	-
	119	93	yes	no	-	-	-	-	-	-	-	-	-	-	-	-	1	1	-	-	-	-	-	-
	120	94	yes	no	-	-	-	>20	-	-	-	-	-	-	3	-	-	7	-	11	-	-	-	-
	121	95	yes	no	-	-	-	6	-	-	-	-	-	-	-	-	-	-	-	-	-	-	-	many inclusions <2µm
	122	96	yes	no	-	-	-	-	-	-	-	-	-	-	-	-	-	1	-	1	-	-	-	-
	125	97	no	no	-	-	-	-	-	-	-	-	-	-	-	-	-	-	-	-	-	-	-	-
	126	98	yes	no	-	-	-	-	-	-	-	-	-	-	-	2	-	-	1	-	-	-	-	-
	127	99	yes	no	>20	-	-	>20	-	-	-	-	-	-	-	-	-	-	-	2	-	-	-	hundreds of rutile inclusions
	128	100	no	no	-	-	-	-	-	-	-	-	-	-	-	-	-	-	-	-	-	-	-	-
	130	101	no	no	-	-	-	-	-	-	-	-	-	-	-	-	-	-	-	-	-	-	-	-
	131	102	no	no	-	-	-	-	-	-	-	-	-	-	-	-	-	-	-	-	-	-	-	-
	132	103	yes	no	1	-	-	3	-	-	>20	-	-	-	-	-	-	2	-	-	-	-	-	-
	133	104	yes	no	-	-	-	1	-	-	-	-	-	-	-	-	-	-	-	-	-	-	-	-
	134	105	no	no	-	-	-	-	-	-	-	-	-	-	-	-	-	-	-	-	-	-	-	-
	135	106	no	no	-	-	-	-	-	-	-	-	-	-	-	-	-	-	-	-	-	-	-	-
	136	107	yes	no	-	-	1	-	-	-	-	-	-	-	-	-	-	-	-	1	-	anatase (at surface)	-	-
	137	108	no	no	-	-	-	-	-	-	-	-	-	-	-	-	-	-	-	-	-	-	-	-
	138	109	no	no	-	-	-	-	-	-	-	-	-	-	-	-	-	-	-	-	-	-	-	-
	139	110	no	no	-	-	-	-	-	-	-	-	-	-	-	-	-	-	-	-	-	-	-	-
	140	111	no	no	-	-	-	-	-	-	-	-	-	-	-	-	-	-	-	-	-	-	-	-
	141	112	yes	no	-	-	-	5	-	-	1	-	-	-	-	-	-	3	-	-	-	-	-	-
	142	113	yes	no	-	-	-	-	-	-	-	-	-	-	-	-	-	3	-	-	-	-	-	-
	143	114	no	no	-	-	-	-	-	-	-	-	-	-	-	-	-	-	-	-	-	-	-	-
	144	115	no	no	-	-	-	-	-	-	-	-	-	-	-	-	-	-	-	-	-	-	-	-
	145	116	yes	no	-	-	-	-	-	-	-	-	-	-	-	-	-	-	-	1	-	-	-	-
	146	117	yes	no	-	-	-	>20	-	-	-	-	-	-	-	-	-	3	-	4	-	-	-	-
	147	118	no	no	-	-	-	-	-	-	-	-	-	-	-	-	-	-	-	-	-	-	-	-
	150	119	no	no	-	-	-	-	-	-	-	-	-	-	-	-	-	-	-	-	-	-	-	-
	152	120	no	no	-	-	-	-	-	-	-	-	-	-	-	-	-	-	-	-	-	-	-	-
	153	121	yes	no	-	-	-	14	-	-	-	-	-	-	-	-	-	-	-	1	-	-	-	-
	154	122	yes	no	-	-	-	4	-	-	-	-	-	-	2	-	-	9	-	>20	-	-	-	-
	155	123	yes	no	1	-	-	1	-	-	1	-	-	-	-	-	-	6	-	-	-	-	-	-
	156	124	yes	no	16	-	-	1	-	-	-	-	-	-	-	-	-	1	-	2	-	-	-	-
	157	125	yes	no	-	-	-	19	-	-	-	-	-	-	-	-	-	2	-	-	-	-	-	-
	158	126	yes	no	-	-	-	1	-	-	-	-	-	-	-	-	-	-	-	-	-	-	-	-
	159	127	no	no	-	-	-	-	-	-	-	-	-	-	-	-	-	-	-	-	-	-	-	-
	160	128	no	no	-	-	-	-	-	-	-	-	-	-	-	-	-	-	-	-	-	-	-	-
	162	129	yes	no	-	-	-	6	-	-	-	-	-	-	-	-	1	1	-	-	-	-	kyanite + rutile (1)	-
	163	130	yes	no	-	-	-	5	-	-	-	-	-	-	-	-	6	-	-	-	-	-	kyanite + rutile (5)	-
	164	131	yes	no	-	-	-	-	-	-	>20	-	-	-	-	-	-	-	-	-	-	-	-	-
	166	132	yes	no	1	-	-	-	-	-	>20	-	-	-	-	-	-	3	-	1	-	-	-	large quartz inclusions with fractures
	168	133	yes	no	-	-	-	6	-	-	1	-	1	-	-	-	-	-	-	-	-	-	-	-
	169	134	yes	no	-	-	-	-	-	-	-	-	-	-	-	-	-	1	-	-	-	-	-	-
	171	135	yes	no	-	-	-	>20	-	-	-	-	-	-	-	-	-	11	-	>20	2	-	-	-
	172	136	yes	no	-	-	-	13	-	-	-	-	-	-	-	-	-	1	-	-	-	-	-	-
	173	137	no	no	-	-	-	-	-	-	-	-	-	-	-	-	-	-	-	-	-	-	-	-
	174	138	no	no	-	-	-	-	-	-	-	-	-	-	-	-	-	-	-	-	-	-	-	lithoclast: garnet + quartz
	175	139	no	no	-	-	-	-	-	-	-	-	-	-	-	-	-	-	-	-	-	-	-	-
	176	140	no	no	-	-	-	-	-	-	-	-	-	-	-	-	-	-	-	-	-	-	-	-
	177	141	yes	no	1	-	-	-	-	-	-	-	-	-	-	-	3	1	-	-	-	-	-	-
	178	142	yes	no	3	-	-	7	-	-	-	-	-	-	-	-	-	1	-	-	-	-	-	lithoclast: garnet + plagioclase
	179	143	yes	no	-	-	-	-	-	-	12	-	-	-	-	-	-	-	-	-	-	-	-	-
	180	144	yes	no	-	-	-	9	-	-	-	-	-	-	-	-	-	-	-	-	-	-	-	lithoclast: garnet + quartz
	181	145	no	no	-	-	-	-	-	-	-	-	-	-	-	-	-	-	-	-	-	-	-	-
	182	146	yes	no	-	-	-	12	-	-	-	-	-	-	-	-	-	3	-	7	-	-	-	-
	183	147	yes	no	-	-	-	>20	-	-	-	-	-	-	-	-	-	2	-	-	-	-	-	many inclusions <2 µm
	184	148	no	no	-	-	-	-	-	-	-	-	-	-	-	-	-	-	-	-	-	-	-	lithoclast: garnet + plagioclase
	185	149	yes	no	-	-	-	8	-	-	-	-	-	-	-	1	-	1	-	-	-	-	-	-
	186	150	yes	no	-	-	-	1	-	-	-	-	-	-	-	-	1	-	-	1	1	-	-	-
	187	151	yes	no	-	-	-	11	-	-	-	-	-	-	-	-	-	-	-	12	-	-	-	-
	188	152	yes	no	-	-	-	3	-	-	-	-	-	-	-	-	-	2	-	1	3	-	-	-
	189	153	yes	yes	2	1	-	-	-	1	-	-	-	-	-	-	-	-	-	1	-	-	-	-
	190	154	no	no	-	-	-	-	-	-	-	-	-	-	-	-	-	-	-	-	1	-	-	opaque: probably chalcopyrite
	191	155	no	no	-	-	-	-	-	-	-	-	-	-	-	-	-	-	-	-	-	-	-	-
	192	156	yes	no	-	-	-	3	-	-	-	-	-	-	-	-	-	-	-	-	-	-	-	lithoclast: garnet + quartz
	193	157	no	no	-	-	-	-	-	-	-	-	-	-	-	-	-	-	-	-	-	-	-	-
	195	158	no	no	-	-	-	-	-	-	-	-	-	-	-	-	-	-	-	-	-	-	-	-
	196	159	no	no	-	-	-	-	-	-	-	-	-	-	-	-	-	-	-	-	-	-	-	-
	197	160	yes	no	8	-	-	>20	-	-	-	-	-	-	-	-	-	1	1	1	-	-	-	hundreds of rutile inclusions
		160	100	4	24	4	1	73	0	4	17	0	8	0	2	4	12	57	3	39	12	6	11
	Results: JS-Erz-14s 125-250 µm
	Grain number	Garnet number	Inclusions ≥2 µm	UHP inclusions	oxides				feldspars		carbon polymorphs		micas		pyroxenes	nesosilicates			carbonate minerals	apatite/ monazite	opaque	others	polyphase inclusions	remarks
					quartz	coesite	cristobalite	rutile	alkali feldspar	plagioclase	graphite	diamond	muscovite-paragonite	phlogopite-biotite	omphacite	titanite	kyanite	zircon
	1	1	yes	no	-	-	-	12	-	-	-	-	2	-	-	-	-	2	-	-	-	-	-	-
	2	2	yes	no	15	-	-	16	-	-	1	-	-	-	-	-	-	1	-	6	-	-	-	OH-bands present in apatite/monazite spectra; many inclusions <2 µm
	3	3	yes	no	-	-	-	-	-	-	>20	-	-	-	-	-	-	-	-	-	-	-	-	-
	4	4	no	no	-	-	-	-	-	-	-	-	-	-	-	-	-	-	-	-	-	-	-	-
	5	5	no	no	-	-	-	-	-	-	-	-	-	-	-	-	-	-	-	-	-	-	-	many inclusions <2 µm
	6	6	yes	no	-	-	-	3	-	-	-	-	-	-	-	-	-	-	-	-	-	-	-	-
	7	7	no	no	-	-	-	-	-	-	-	-	-	-	-	-	-	-	-	-	-	-	-	-
	11	8	no	no	-	-	-	-	-	-	-	-	-	-	-	-	-	-	-	-	-	-	-	-
	17	9	yes	no	-	-	-	3	-	-	-	-	-	-	-	-	-	-	-	1	-	-	-	-
	18	10	yes	no	1	-	-	1	-	-	4	-	-	-	-	-	-	-	-	7	1	-	graphite + apatite/monazite + rutile (1) apatite/monazite + opaque (1)	one apatite/monazite = monazite(Ce)
	19	11	yes	no	-	-	-	6	-	-	-	-	-	-	-	-	-	1	-	-	-	-	-	-
	21	12	yes	no	>20	-	-	-	-	-	-	-	-	-	-	-	-	-	-	-	-	-	-	hundreds of quartz inclusions
	23	13	yes	no	-	-	-	-	-	-	-	-	-	-	-	-	-	1	-	-	-	-	-	-
	25	14	no	no	-	-	-	-	-	-	-	-	-	-	-	-	-	-	-	-	-	-	-	-
	27	15	yes	no	-	-	-	-	-	-	>20	-	-	-	-	-	-	-	-	-	-	-	-	-
	29	16	yes	no	2	-	-	9	-	-	-	-	-	-	-	2	-	3	-	-	-	anatase (at surface)	-	-
	32	17	no	no	-	-	-	-	-	-	-	-	-	-	-	-	-	-	-	-	-	-	-	-
	35	18	yes	no	-	-	-	8	-	-	-	-	-	-	-	-	-	1	-	1	-	-	-	-
	38	19	yes	no	-	-	-	>20	-	-	-	-	-	-	-	-	-	2	-	-	-	-	-	-
	39	20	no	no	-	-	-	-	-	-	-	-	-	-	-	-	-	-	-	-	1	-	-	opaque: arzakite/hematite
	46	21	yes	no	-	-	-	-	-	-	9	-	-	-	-	-	-	-	-	-	-	-	-	-
	52	22	no	no	-	-	-	-	-	-	-	-	-	-	-	-	-	-	-	-	-	-	-	-
	56	23	yes	no	-	-	-	-	-	-	6	-	-	-	-	-	-	3	-	-	-	-	-	-
	57	24	yes	no	2	-	-	11	-	-	>20	-	-	-	-	-	-	-	-	1	-	-	graphite + quartz + rutile (1)	polyphase inclusions similar to polyphase inclusions in sample JS-Erz-9s
	59	25	yes	no	-	-	-	-	-	-	>20	-	-	-	-	-	-	-	-	-	-	-	-	-
	60	26	yes	no	>20	-	-	>20	-	-	2	-	-	-	-	-	-	>20	-	>20	-	-	-	-
	61	27	yes	no	-	-	-	-	-	-	-	-	-	-	-	-	-	-	-	1	2	-	-	apatite/monazite = monazite(Ce)
	62	28	yes	no	-	-	-	-	-	-	2	-	-	-	-	-	-	1	-	-	-	-	-	many inclusions <2 µm
	63	29	no	no	-	-	-	-	-	-	-	-	-	-	-	-	-	-	-	-	-	-	-	-
	64	30	yes	no	-	-	-	3	-	-	1	-	-	-	-	-	-	6	-	3	-	-	-	-
	65	31	yes	no	-	-	-	-	-	-	1	-	-	-	-	-	-	-	-	1	6	-	-	-
	66	32	yes	no	-	-	-	>20	-	-	7	-	-	-	-	-	-	-	-	1	-	-	-	-
	69	33	yes	no	8	-	-	>20	-	-	-	-	-	-	-	-	-	-	1	5	-	-	quartz + rutile (1) rutile + carbonate mineral (1)	-
	70	34	yes	no	>20	-	-	-	-	-	>20	-	-	-	-	>20	-	-	-	-	-	-	-	hundreds of titanite inclusions
	71	35	no	no	-	-	-	-	-	-	-	-	-	-	-	-	-	-	-	-	-	-	-	-
	73	36	yes	no	>20	-	-	-	-	-	-	-	-	-	-	-	-	-	-	-	-	-	-	hundreds of quartz inclusions
	75	37	no	no	-	-	-	-	-	-	-	-	-	-	-	-	-	-	at surface	-	-	-	-	-
	76	38	yes	no	4	-	-	1	-	-	-	-	-	-	-	-	-	1	-	5	1	-	-	-
	77	39	yes	no	-	-	-	>20	-	-	2	-	-	-	-	-	-	3	-	-	-	-	-	-
	78	40	yes	no	-	-	-	-	-	-	-	-	-	1	-	-	-	-	5	-	-	pyrophyllite (1)	-	-
	79	41	yes	no	-	-	-	3	-	-	-	-	-	-	-	-	-	-	-	-	4	-	-	opaque: probably allanite
	81	42	yes	no	-	-	-	4	-	-	>20	-	-	-	-	-	-	3	-	-	-	-	-	-
	85	43	yes	no	-	-	-	3	-	-	-	-	-	-	-	-	-	-	-	-	-	-	-	-
	86	44	no	no	-	-	-	-	-	-	-	-	-	-	-	-	-	-	-	-	-	-	-	-
	87	45	yes	no	8	-	-	6	-	-	-	-	-	-	-	-	-	-	-	1	-	-	-	-
	88	46	yes	no	2	-	-	7	-	-	4	-	1	-	-	-	1	5	-	1	-	-	kyanite + rutile (1) graphite + muscovite-paragonite + rutile (1)	many inclusions <2 µm
	89	47	yes	yes	-	2	-	19	-	-	-	-	-	-	-	-	1	1	-	-	-	-	zircon + rutile (1)	-
	94	48	yes	no	-	-	-	13	-	-	5	-	-	-	-	-	-	-	-	-	-	-	-	garnet host altered
	96	49	yes	no	-	-	-	>20	-	-	>20	-	-	-	-	-	-	-	-	-	-	-	-	lithoclast: garnet + quartz
	97	50	yes	no	-	-	-	4	-	-	-	-	-	-	1	-	-	2	-	-	-	-	zircon + rutile (1) omphacite + rutile (1)	-
	101	51	yes	no	-	-	-	3	-	-	-	-	-	-	-	-	-	-	-	1	-	amphibole (at surface)	-	-
	102	52	no	no	-	-	-	-	-	-	-	-	-	-	-	-	-	-	-	-	-	-	-	-
	103	53	yes	no	-	-	-	>20	-	-	11	-	-	-	-	-	-	-	-	-	-	-	-	-
	104	54	yes	no	-	-	-	-	-	-	-	-	-	-	-	-	-	1	-	-	-	-	-	-
	107	55	yes	no	1	-	-	-	-	-	-	-	-	-	-	-	-	-	-	-	-	-	-	-
	112	56	yes	no	-	-	-	11	-	-	-	-	-	-	-	-	-	4	-	2	-	-	-	-
	113	57	yes	no	2	-	-	3	-	-	1	-	-	-	-	-	-	-	-	1	-	-	-	many inclusions <2 µm
	114	58	yes	no	-	-	-	4	-	-	-	-	-	-	-	-	-	-	-	-	-	-	-	-
	117	59	yes	no	-	-	-	-	-	-	6	-	-	-	-	-	-	1	-	-	-	-	-	-
	119	60	yes	no	-	-	-	-	-	-	>20	-	-	-	-	-	-	1	-	-	-	-	-	-
	120	61	yes	no	1	-	-	-	-	-	>20	-	-	-	-	-	-	-	-	-	-	-	-	-
	121	62	yes	no	4	-	-	>20	-	-	-	-	-	-	-	-	-	4	-	-	-	-	zircon + rutile (1)	-
	122	63	no	no	-	-	-	-	-	-	-	-	-	-	-	-	-	-	-	-	-	-	-	-
	123	64	yes	no	-	-	-	-	-	-	>20	-	-	-	-	-	-	6	-	-	-	-	-	-
	128	65	no	no	-	-	-	-	-	-	-	-	-	-	-	-	-	-	-	-	-	-	-	-
	129	66	yes	no	1	-	-	1	-	-	-	-	-	-	-	-	2	-	-	2	-	-	-	apatite/monazite = monazite(Ce)
	130	67	yes	no	-	-	-	-	-	-	2	-	-	-	-	-	-	-	-	-	-	-	-	many inclusions <2 µm
	133	68	yes	no	-	-	-	10	-	-	-	-	-	-	-	-	-	16	-	-	-	-	zircon + rutile (1)	-
	134	69	yes	no	-	-	-	1	-	-	-	-	3	1	-	-	1	1	-	6	-	-	zircon + rutile (1)	-
	135	70	no	no	-	-	-	-	-	-	-	-	-	-	-	-	-	-	-	-	-	-	-	-
	136	71	yes	no	-	-	-	>20	-	-	-	-	-	-	-	-	-	-	-	-	>20	clinochlore (1)	-	-
	146	72	yes	no	-	-	-	6	-	-	-	-	-	-	-	-	-	-	-	5	-	-	-	OH-bands present in apatite/monazite spectra
	148	73	no	no	-	-	-	-	-	-	-	-	-	-	-	-	-	-	-	-	-	-	-	-
	149	74	yes	no	-	-	-	1	-	-	-	-	-	-	-	-	-	-	-	-	-	-	-	-
	150	75	no	no	-	-	-	-	-	-	-	-	-	-	-	-	-	-	-	-	-	-	-	-
	151	76	no	no	-	-	-	-	-	-	-	-	-	-	-	-	-	-	-	-	-	-	-	-
	152	77	no	no	-	-	-	-	-	-	-	-	-	-	-	-	-	-	-	-	-	-	-	-
	153	78	no	no	-	-	-	-	-	-	-	-	-	-	-	-	-	-	-	-	-	-	-	many inclusions <2 µm
	154	79	yes	no	-	-	-	-	-	-	3	-	-	-	-	-	-	2	-	-	-	-	-	-
	155	80	yes	no	6	-	-	>20	-	-	-	-	-	-	-	-	-	-	-	-	-	-	-	-
	156	81	yes	no	-	-	-	1	-	-	-	-	-	-	-	-	-	1	-	1	-	-	-	-
	157	82	yes	no	-	-	-	-	-	-	2	-	-	-	-	-	-	-	-	-	1	-	-	opaque: probably molybdenite
	158	83	yes	no	-	-	-	1	-	-	1	-	-	-	-	-	-	3	-	-	1	-	-	-
	161	84	no	no	-	-	-	-	-	-	-	-	-	-	-	-	-	-	-	-	-	-	-	-
	162	85	yes	no	-	-	-	3	-	-	-	-	-	-	-	-	-	2	-	-	-	-	-	-
	164	86	yes	no	4	-	-	-	-	-	>20	-	-	-	-	-	-	3	-	-	-	-	-	-
	168	87	yes	no	-	-	-	3	-	-	>20	-	-	-	-	-	-	-	-	-	-	-	-	many inclusions <2 µm
	169	88	yes	no	9	-	-	-	-	-	-	-	-	-	-	-	-	-	-	-	-	-	-	-
	170	89	yes	no	12	-	-	>20	-	-	>20	-	-	-	-	-	-	1	-	-	7	-	graphite + rutile (2) rutile + opaque (3)	many inclusions <2 µm; one opaque: probably allanite
	171	90	yes	no	-	-	-	9	-	-	>20	-	-	-	-	-	-	1	-	-	-	-	graphite + zircon (1)	many inclusions <2 µm
	172	91	no	no	-	-	-	-	-	-	-	-	-	-	-	-	-	-	-	-	-	-	-	-
	173	92	yes	no	-	-	-	-	-	-	2	-	-	-	-	-	-	-	-	1	-	-	-	-
	174	93	yes	no	-	-	-	2	-	-	-	-	-	-	-	1	-	-	at surface	-	-	anatase (at surface)	-	many inclusions <2 µm
	175	94	yes	no	-	-	-	-	-	-	11	-	-	-	-	-	-	-	-	-	-	-	-	-
	176	95	no	no	-	-	-	-	-	-	-	-	-	-	-	-	-	-	-	-	-	-	-	-
	177	96	no	no	-	-	-	-	-	-	-	-	-	-	-	-	-	-	-	-	-	-	-	-
	178	97	yes	no	-	-	-	1	-	-	-	-	-	-	-	-	-	-	-	-	1	-	-	opaque: probably molybdenite
	179	98	no	no	-	-	-	-	-	-	-	-	-	-	-	-	-	-	-	-	-	-	-	lithoclast: garnet + quartz
	180	99	yes	no	-	-	-	>20	-	-	-	-	-	-	-	>20	-	-	-	-	-	-	-	-
	181	100	yes	no	1	-	-	2	-	-	11	-	-	-	-	-	-	3	-	11	-	-	graphite + apatite/monazite (3)	many inclusions <2 µm
	182	101	no	no	-	-	-	-	-	-	-	-	-	-	-	-	-	-	-	-	-	-	-	-
	185	102	yes	no	-	-	-	1	-	-	-	-	-	-	-	-	1	-	-	-	1	-	-	-
	187	103	yes	no	-	-	-	3	-	-	>20	-	-	-	-	-	-	5	-	-	-	-	-	-
	188	104	no	no	-	-	-	-	-	-	-	-	-	-	-	-	-	-	-	-	-	-	-	-
	189	105	no	no	-	-	-	-	-	-	-	-	-	-	-	-	-	-	-	-	-	-	-	lithoclast: garnet + quartz
	190	106	no	no	-	-	-	-	-	-	-	-	-	-	-	-	-	-	-	-	-	-	-	-
	191	107	no	no	-	-	-	-	-	-	-	-	-	-	-	-	-	-	-	-	-	-	-	-
	192	108	yes	no	-	-	-	6	-	-	-	-	-	-	-	-	-	6	-	-	-	-	-	-
	194	109	yes	no	-	-	-	-	-	-	1	-	-	-	-	-	-	-	-	-	-	-	-	-
	195	110	yes	no	-	-	-	1	-	-	-	-	-	-	-	-	-	-	-	-	-	-	-	-
	196	111	yes	no	-	-	-	-	-	-	-	-	-	-	-	-	-	2	-	-	-	-	-	many inclusions <2 µm
	201	112	yes	no	-	-	-	7	-	-	-	-	-	-	-	-	-	-	-	-	-	-	-	-
	202	113	no	no	-	-	-	-	-	-	-	-	-	-	-	-	-	-	-	-	-	-	-	-
	203	114	yes	no	19	-	-	3	-	-	2	-	-	-	-	>20	-	2	1	2	1	tourmaline (1)	quartz + rutile + titanite (1) quartz + rutile (1)	-
	204	115	no	no	-	-	-	-	-	-	-	-	-	-	-	-	-	-	-	-	-	-	-	-
	206	116	yes	no	2	-	-	5	-	-	>20	-	-	-	-	2	-	1	-	1	-	pyrophyllite (1) clinochlore (1)	-	many inclusions <2 µm
	207	117	yes	no	-	-	-	>20	-	-	-	-	-	-	-	-	-	-	-	-	-	-	-	lithoclast: garnet + plagioclase
	208	118	yes	no	-	-	-	1	-	-	>20	-	-	-	-	-	-	2	-	-	-	-	graphite + rutile (1)	lithoclast: garnet + quartz + anatase
	209	119	no	no	-	-	-	-	-	-	-	-	-	-	-	-	-	-	-	-	-	-	-	-
	210	120	yes	no	2	-	-	-	-	-	-	-	-	-	-	-	-	2	-	1	-	-	-	lithoclast: garnet + quartz
	211	121	no	no	-	-	-	-	-	-	-	-	-	-	-	-	-	-	-	-	-	-	-	-
	212	122	yes	no	-	-	-	1	-	-	-	-	-	-	-	-	1	-	-	-	-	-	-	-
	214	123	yes	no	-	-	-	1	-	-	-	-	-	-	-	-	-	1	-	-	-	-	-	-
	215	124	yes	no	-	-	-	-	-	-	-	-	-	-	-	-	-	-	-	2	3	-	-	OH-bands present in apatite/monazite spectra
	216	125	yes	no	-	-	-	3	-	-	-	-	-	-	-	-	3	-	-	-	-	-	kyanite + rutile (3)	-
	220	126	yes	no	-	-	-	>20	-	-	-	-	-	-	5	-	-	-	-	-	-	-	-	-
	221	127	yes	no	-	-	-	-	-	-	7	-	-	-	-	-	-	1	-	1	-	-	graphite + zircon (1)	lithoclast: garnet + quartz
	222	128	no	no	-	-	-	-	-	-	-	-	-	-	-	-	-	-	-	-	-	-	-	-
	223	129	no	no	-	-	-	-	-	-	-	-	-	-	-	-	-	-	-	-	-	-	-	-
	224	130	yes	no	>20	-	-	>20	-	-	>20	-	-	-	-	-	-	6	1	>20	-	-	graphite + apatite/monazite (7) rutile + carbonate mineral (1)	-
	225	131	no	no	-	-	-	-	-	-	-	-	-	-	-	-	-	-	-	-	-	-	-	-
	231	132	yes	no	-	-	-	-	-	-	>20	-	-	-	-	-	-	-	-	-	-	-	-	-
	232	133	yes	no	-	-	-	2	-	-	4	-	-	-	-	-	-	-	-	-	-	-	-	-
	236	134	yes	no	-	-	-	1	-	-	-	-	-	-	-	-	-	-	-	-	-	-	-	-
	238	135	yes	no	-	-	-	>20	-	-	-	-	-	-	-	-	-	1	-	-	-	-	-	thousands of rutile inclusions
	240	136	yes	no	1	-	-	-	-	-	-	-	-	-	-	-	-	1	-	-	1	-	-	-
	241	137	yes	no	-	-	-	7	-	-	-	-	-	-	-	-	-	3	-	4	-	-	-	-
	242	138	yes	yes	-	1	-	-	-	-	-	-	-	-	-	-	-	-	-	-	-	-	-	-
		138	100	2	27	2	0	66	0	0	45	0	3	2	2	6	7	46	4	30	15	7	17
